# Supplementary material for: Human DUX4 and mouse Dux interact with STAT1 and broadly inhibit interferon-stimulated gene induction
Source: eLife journal article supplement (doi:10.7554/elife.82057), 2023-04-24
Supplement: fig3-data9 [file elife-82057-fig3-data9-v3.zip]

white light

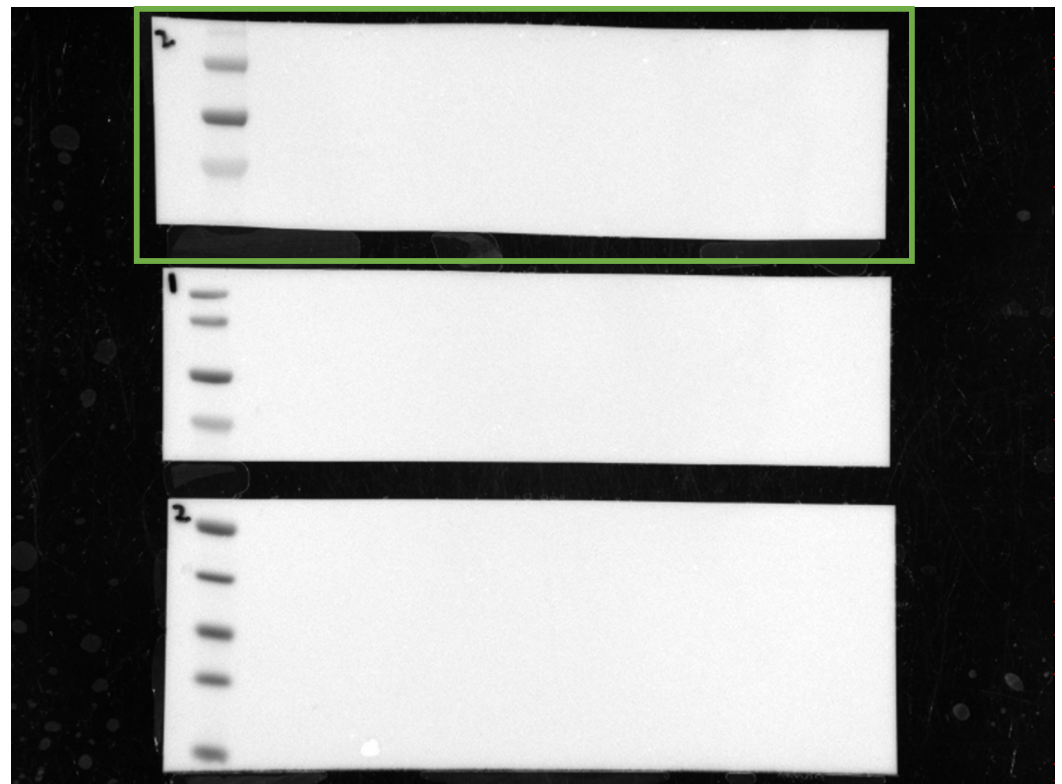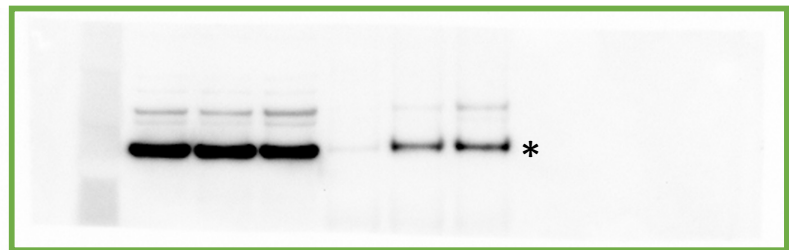

chemiluminescence

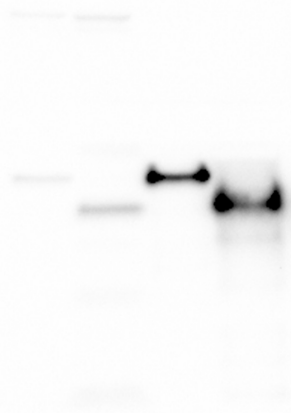

**Figure 3 Source Data 9. Validation co-IP from inducible MB135 cell lines, anti-PABPC1.** Western blot showing anti-PABPC1 signal. \* marks correct size band. Blot was physically cut to probe with multiple antibodies, multiple separate blots were imaged in this exposure/file. TOP BLOT (boxed in green) is relevant for this figure and was probed with anti-PABPC1. Signal from ECL only appears in the chemiluminescence channel. Protein ladder appears in white light channel.
