# Supplementary material for: Human DUX4 and mouse Dux interact with STAT1 and broadly inhibit interferon-stimulated gene induction
Source: eLife journal article supplement (doi:10.7554/elife.82057), 2023-04-24
Supplement: fig4-data1 [file elife-82057-fig4-data1-v2.zip]

chemiluminescence

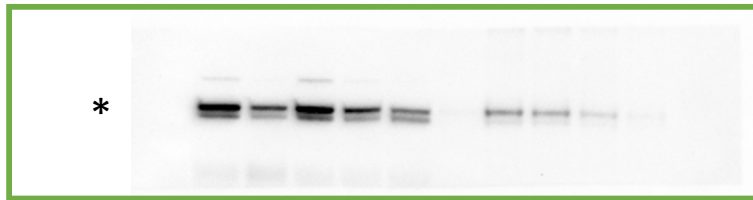

**Figure 4 Source Data 1. Co-IP from inducible MB135 cell lines, anti-STAT1.** Western blot showing anti-STAT1 signal for Figure 4a. \* marks correct size band. Blot was physically cut to probe with multiple antibodies, multiple separate blots were imaged in this exposure/file. TOP LEFT BLOT (boxed in green) is relevant for this figure and was probed with anti-STAT1. The multiple bands represent the alpha (upper) and beta (lower) isoforms of STAT1.
