# Supplementary material for: Human DUX4 and mouse Dux interact with STAT1 and broadly inhibit interferon-stimulated gene induction
Source: eLife journal article supplement (doi:10.7554/elife.82057), 2023-04-24
Supplement: fig4-data2 [file elife-82057-fig4-data2-v3.zip]

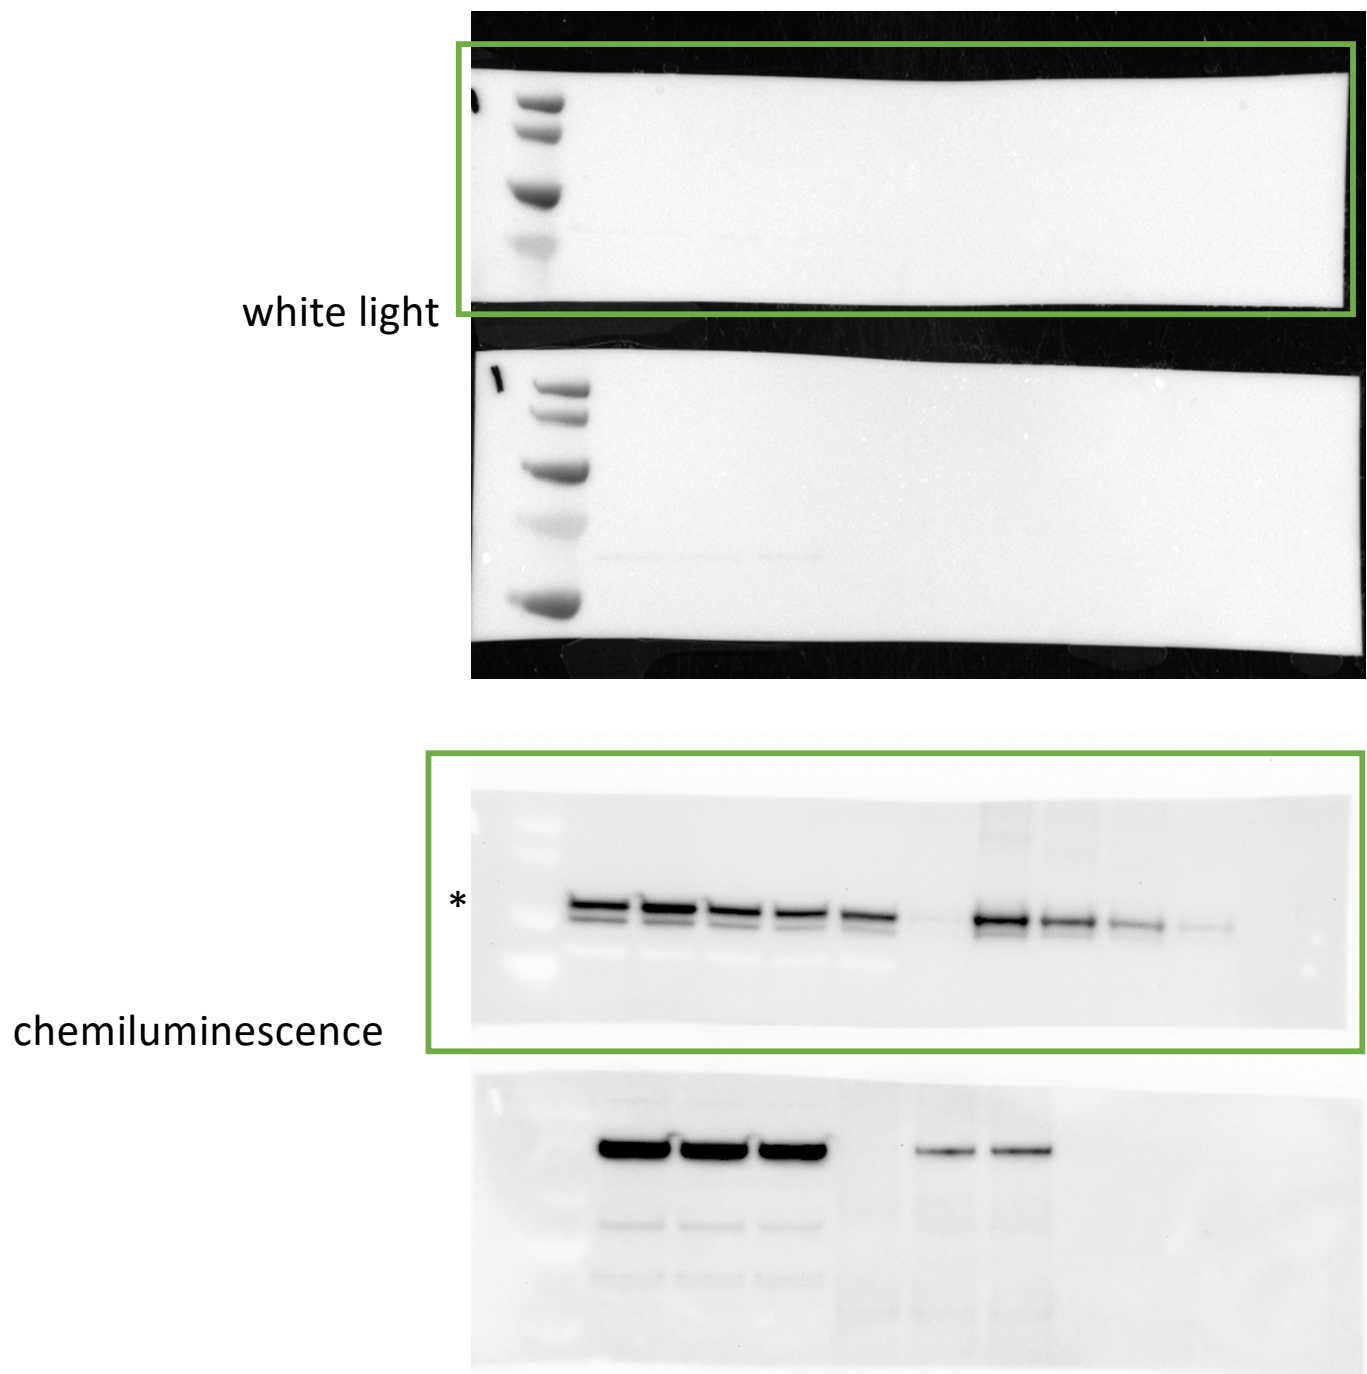

**Figure 4 Source Data 2. Co-IP from inducible MB135 cell lines, anti-pSTAT1(Y701).** Western blot showing anti-pSTAT1(Y701) signal for Figure 4a. \* marks correct size band. Blot was physically cut to probe with multiple antibodies, multiple unrelated blots were imaged in this exposure/file. TOP BLOT (boxed in green) is relevant for this figure and was probed with anti-pSTAT1(Y701). Protein ladder appears in white light channel. Signal from ECL only appears in the chemiluminescence channel. The multiple bands represent the alpha (upper) and beta (lower) isoforms of STAT1.
