# Supplementary material for: Human DUX4 and mouse Dux interact with STAT1 and broadly inhibit interferon-stimulated gene induction
Source: eLife journal article supplement (doi:10.7554/elife.82057), 2023-04-24
Supplement: fig4-data3 [file elife-82057-fig4-data3-v3.zip]

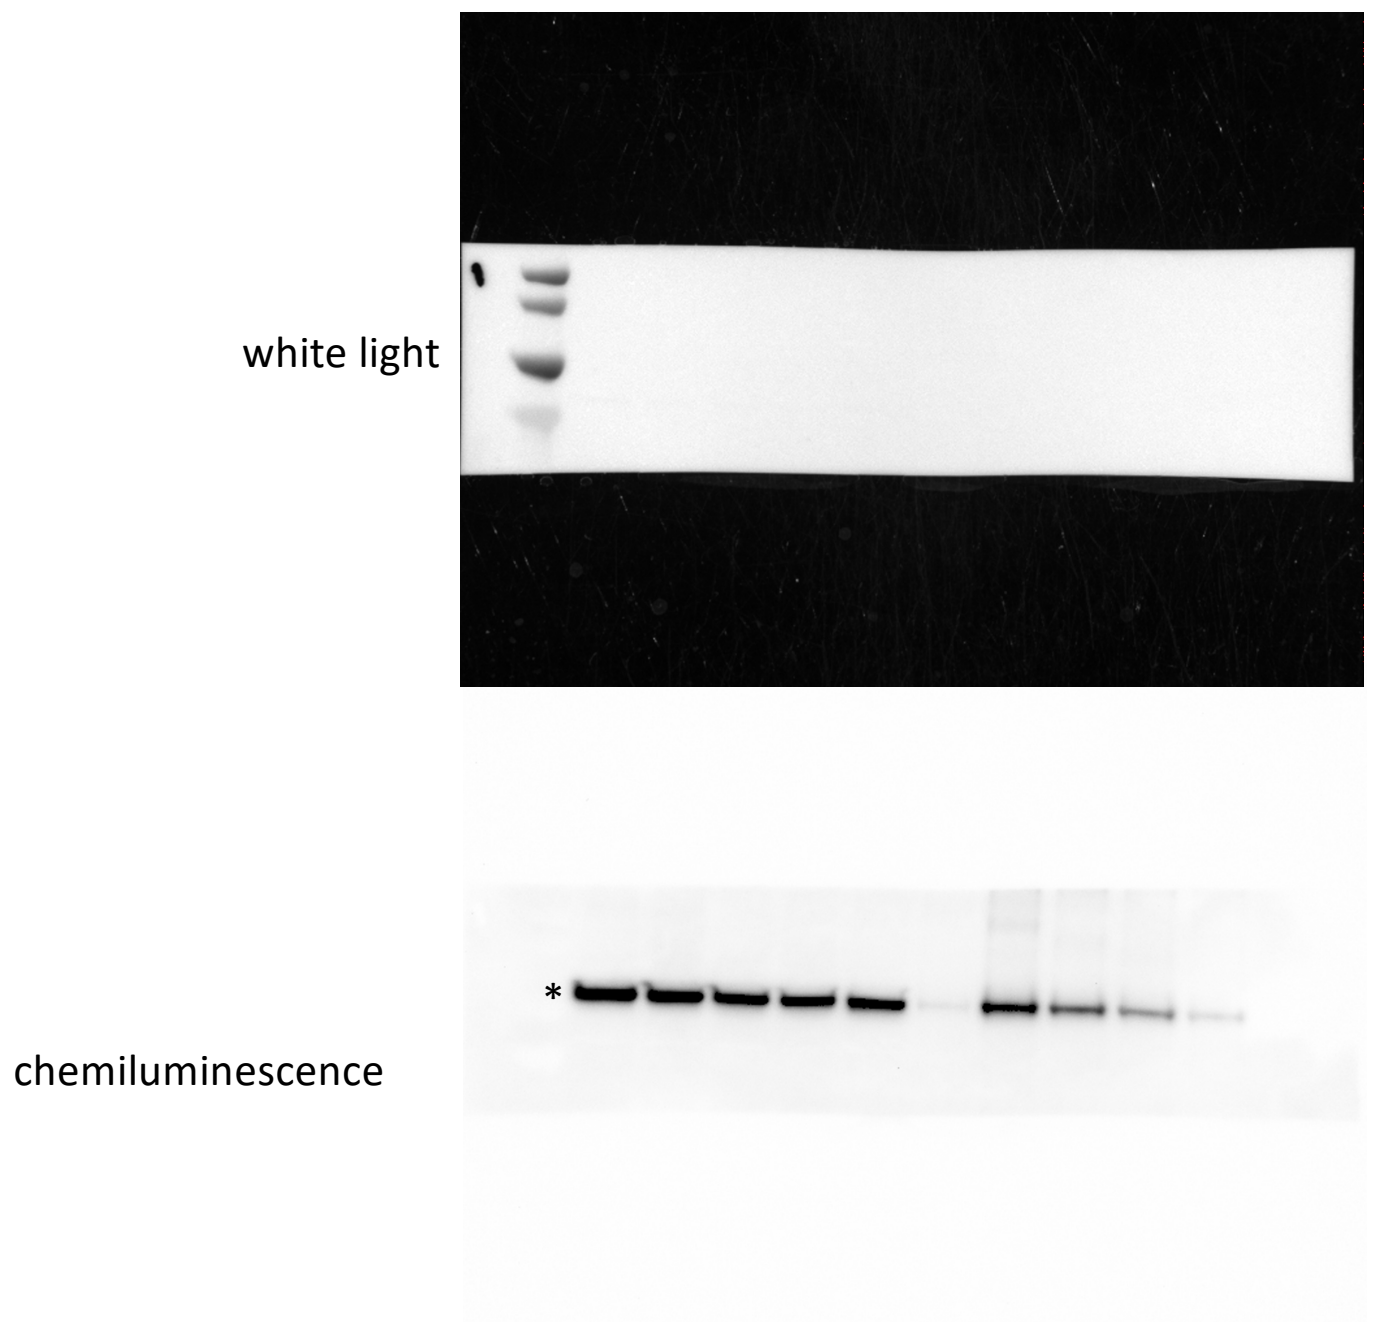

**Figure 4 Source Data 3. Co-IP from inducible MB135 cell lines, anti-pSTAT1(S727).** Western blot showing anti-pSTAT1(S727) signal for Figure 4a. \* marks correct size band. This blot is probed with anti-pSTAT1(S727). Protein ladder appears in white light channel. Signal from ECL only appears in the chemiluminescence channel.
