# Supplementary material for: Human DUX4 and mouse Dux interact with STAT1 and broadly inhibit interferon-stimulated gene induction
Source: eLife journal article supplement (doi:10.7554/elife.82057), 2023-04-24
Supplement: fig4-data4 [file elife-82057-fig4-data4-v3.zip]

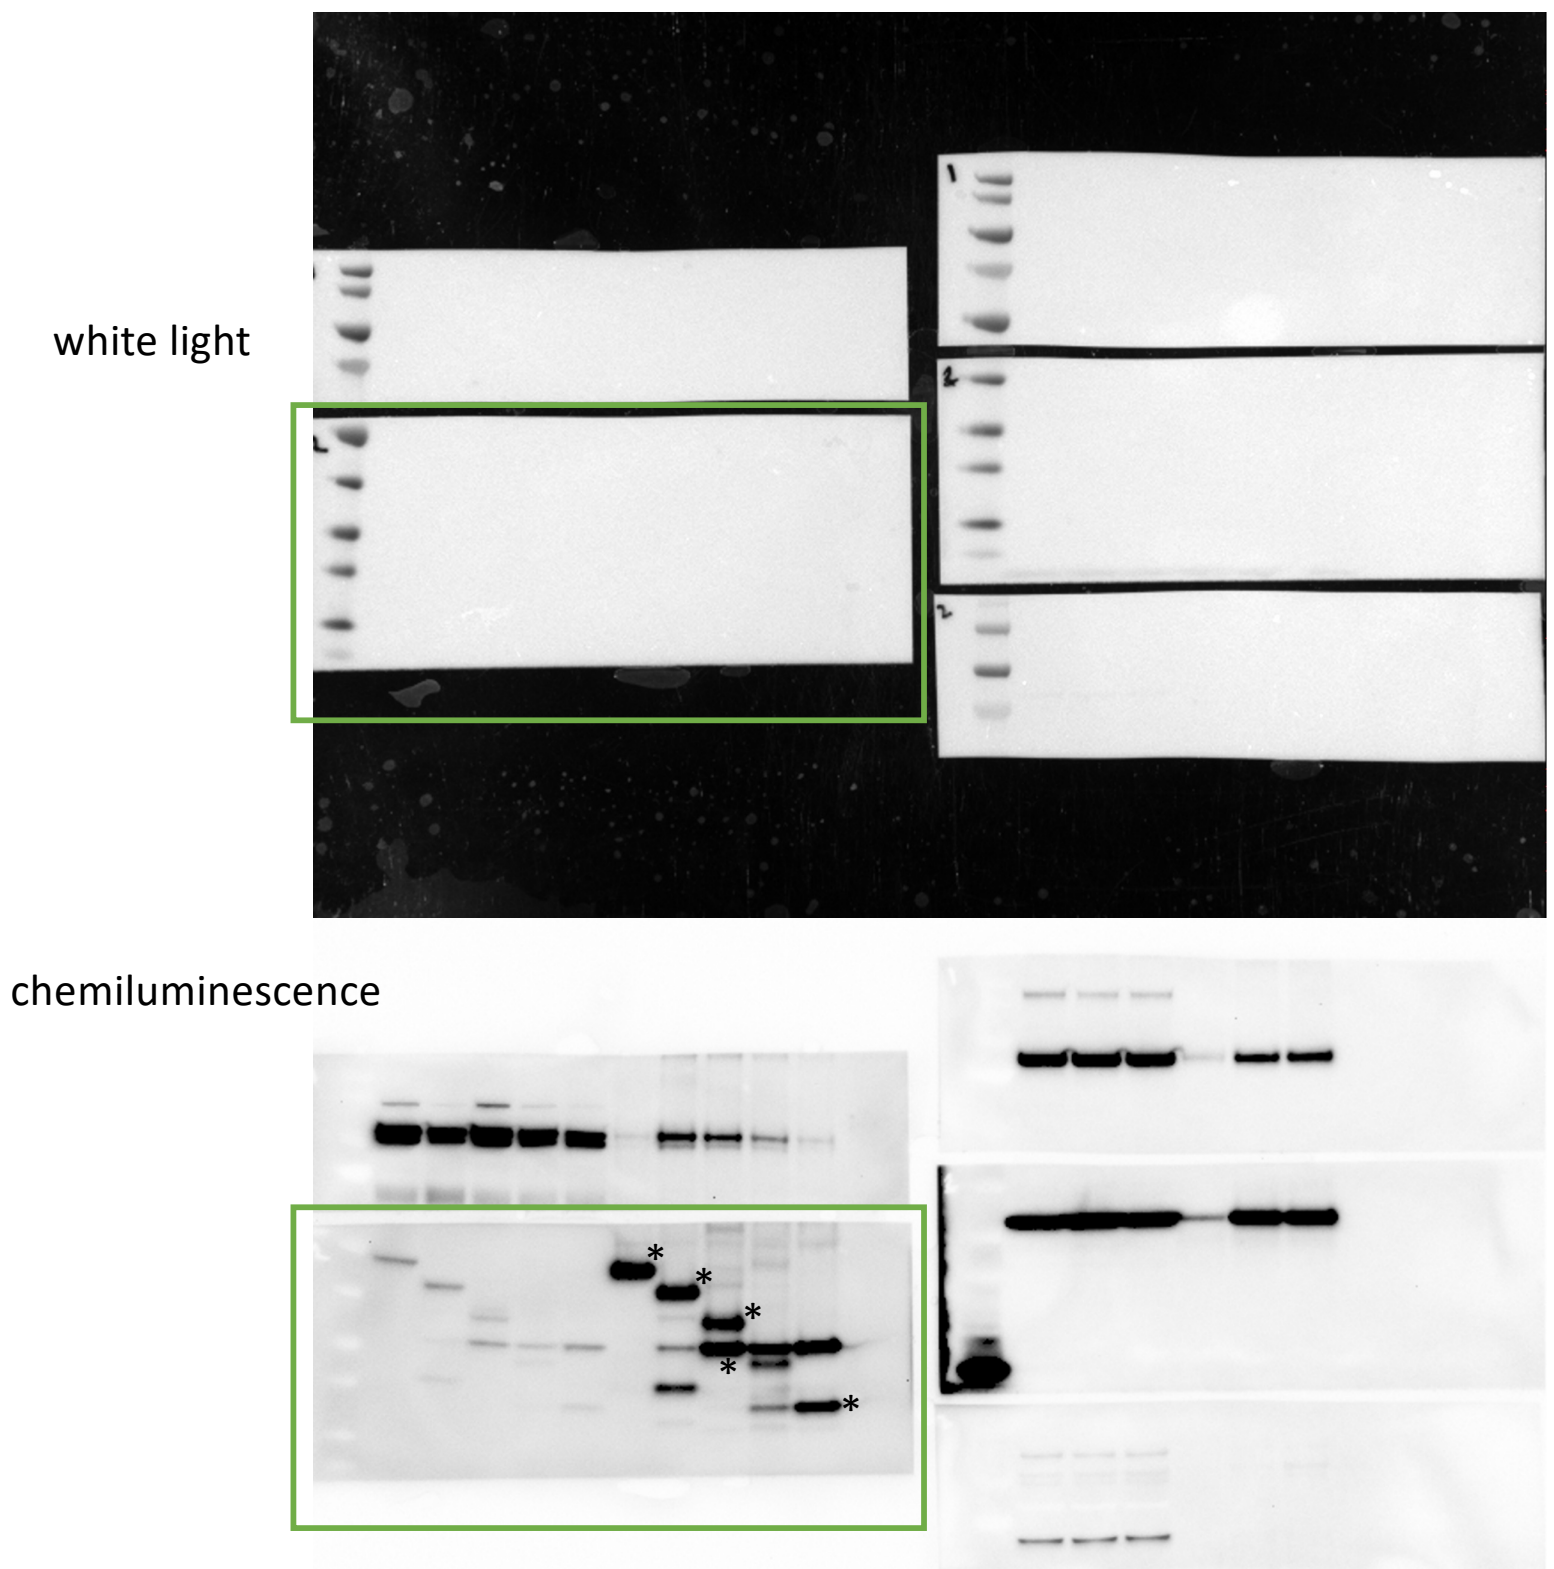

**Figure 4 Source Data 4. Co-IP from inducible MB135 cell lines, anti-FLAG.** Western blot showing anti-FLAG signal for Figure 4a. \* marks correct size band. Blot was physically cut to probe with multiple antibodies, multiple unrelated blots were imaged in this exposure/file. BOTTOM LEFT BLOT (boxed in green) is probed with anti-FLAG. Protein ladder appears in white light channel. Signal from ECL only appears in the chemiluminescence channel.
