# Supplementary material for: Human DUX4 and mouse Dux interact with STAT1 and broadly inhibit interferon-stimulated gene induction
Source: eLife journal article supplement (doi:10.7554/elife.82057), 2023-04-24
Supplement: fig4-data5 [file elife-82057-fig4-data5-v2.zip]

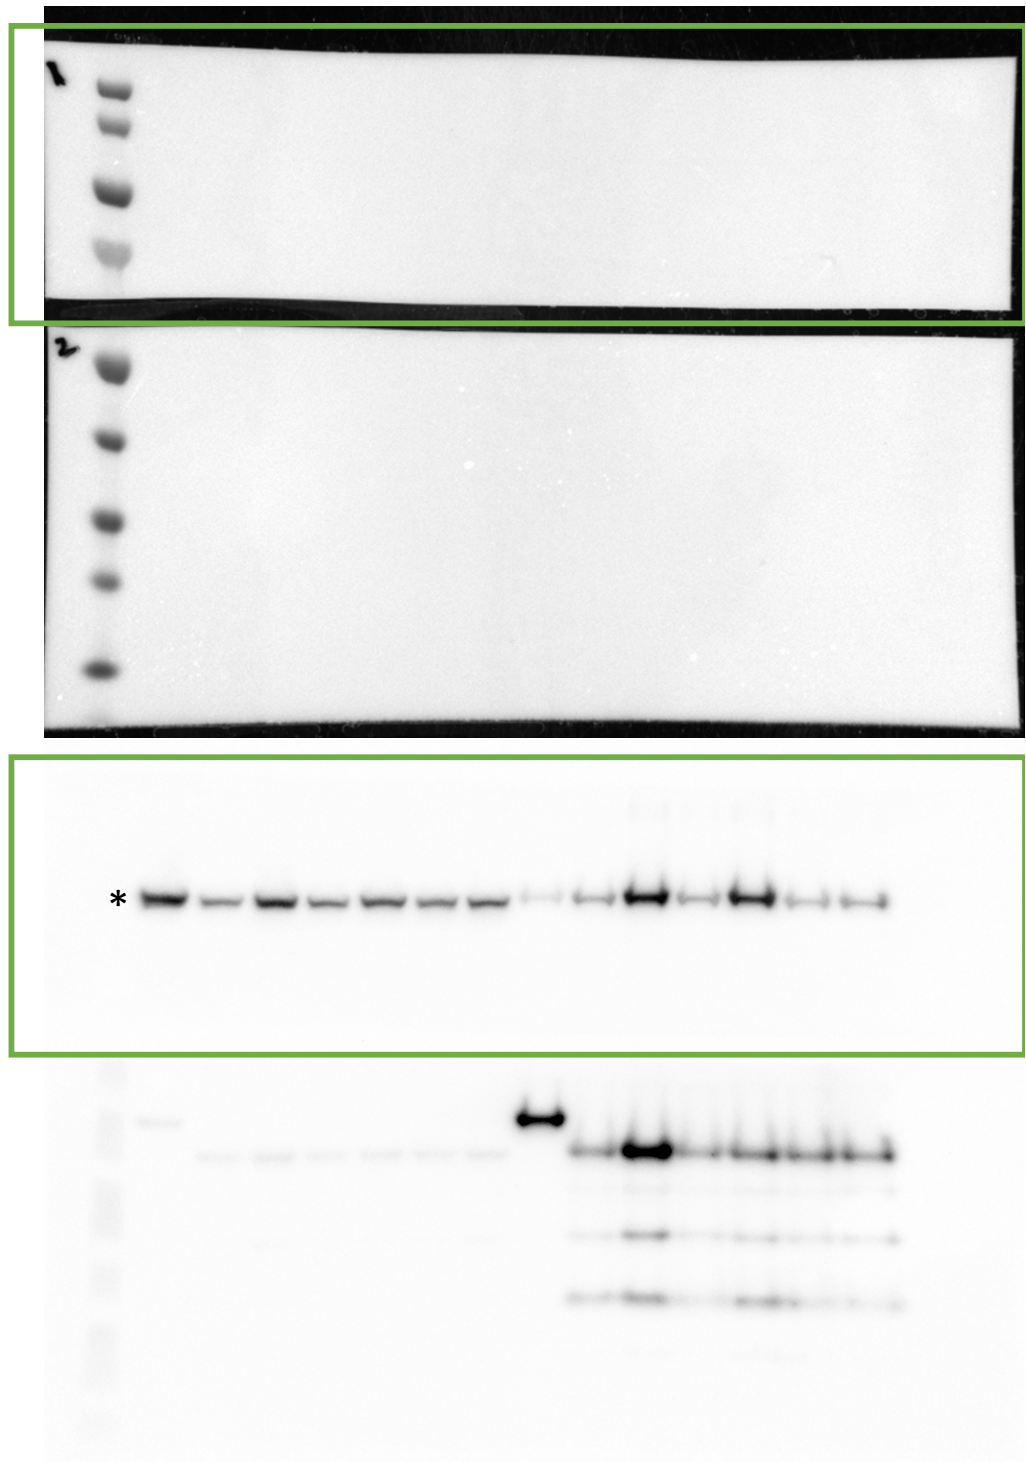

**Figure 4 Source Data 5. Co-IP from dual-inducible MB135 cell lines, anti-MYC.** Western blot showing anti-MYC signal for Figure 4b. \* marks correct size band. Blot was physically cut to probe with multiple antibodies, multiple separate blots were imaged in this exposure/file. TOP BLOT (boxed in green) is relevant for this figure and was probed with anti-MYC to detect the INDUCIBLE MYC-tagged STAT1 or STAT1-mutant transgene. Signal from ECL only appears in the chemiluminescence channel. Protein ladder appears in white light channel.
