# Supplementary material for: Human DUX4 and mouse Dux interact with STAT1 and broadly inhibit interferon-stimulated gene induction
Source: eLife journal article supplement (doi:10.7554/elife.82057), 2023-04-24
Supplement: fig4-data6 [file elife-82057-fig4-data6-v2.zip]

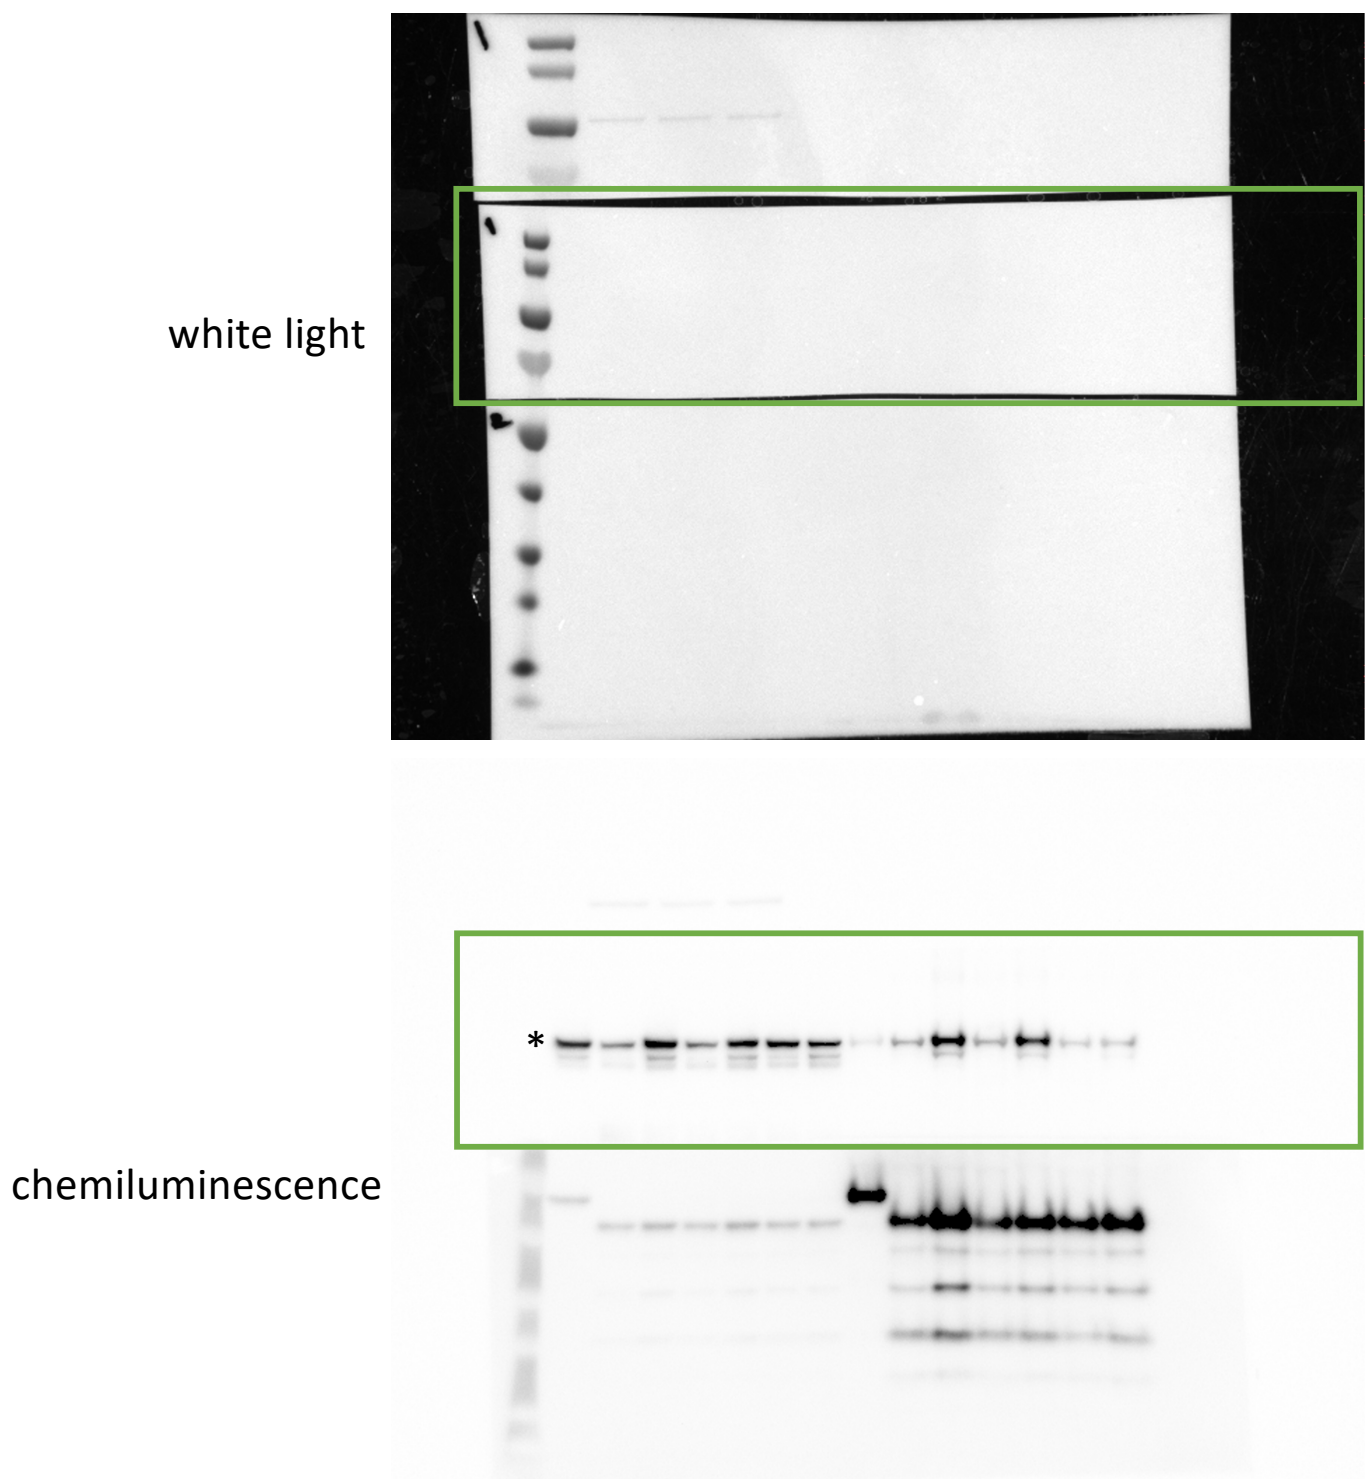

**Figure 4 Source Data 6. Co-IP from dual-inducible MB135 cell lines, anti-STAT1.** Western blot showing anti-STAT1 signal for Figure 4b. \* marks correct size band. Blot was physically cut to probe with multiple antibodies, multiple unrelated blots were imaged in this exposure/file. MIDDLE BLOT (boxed in green) is probed with anti-STAT1 to detect the INDUCIBLE MYC-tagged STAT1 transgene. Protein ladder only appears in the “white light” exposure, signal from ECL only appears in the chemiluminescence channel.
