# Supplementary material for: Human DUX4 and mouse Dux interact with STAT1 and broadly inhibit interferon-stimulated gene induction
Source: eLife journal article supplement (doi:10.7554/elife.82057), 2023-04-24
Supplement: fig4-data8 [file elife-82057-fig4-data8-v2.zip]

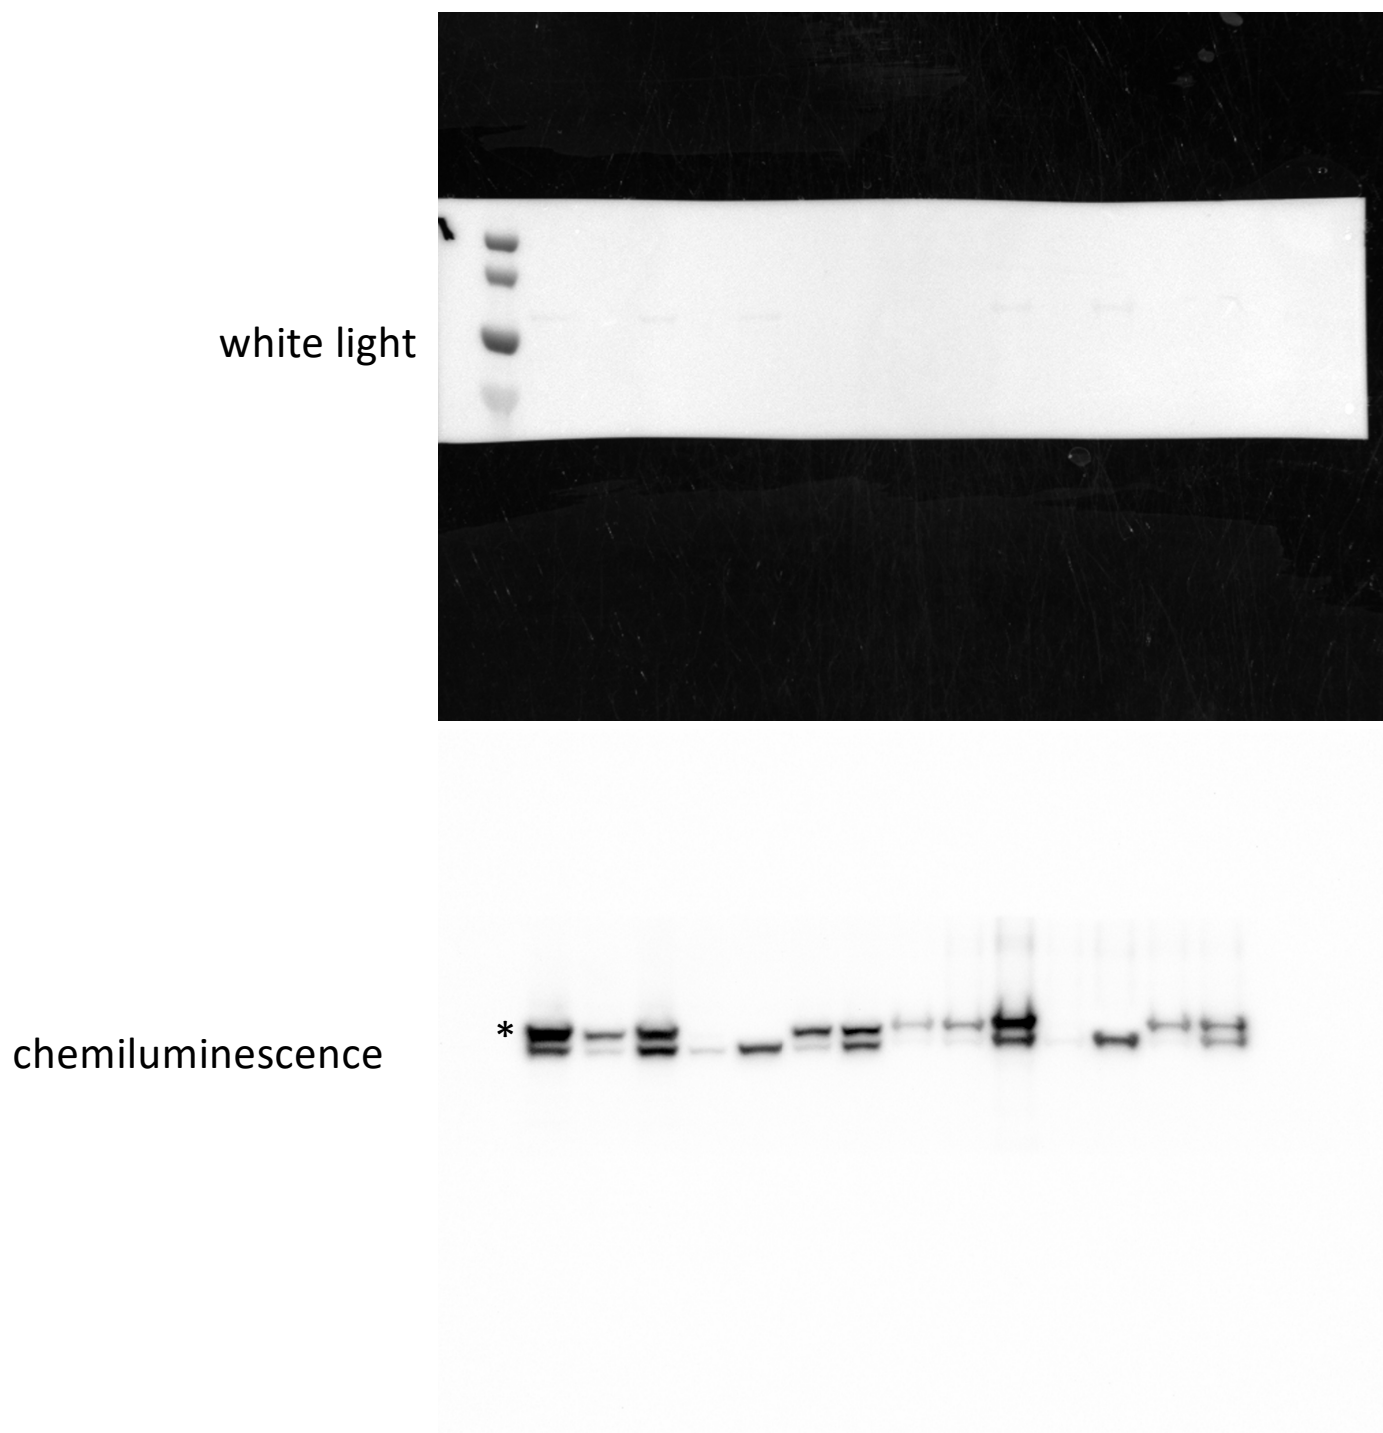

**Figure 4 Source Data 8. Co-IP from dual-inducible MB135 cell lines, anti-pSTAT1(S727).** Western blot showing anti-pSTAT1(S727) signal for Figure 4b. \* marks correct size band for the INDUCIBLE MYC-tagged STAT1 or mutated-STAT1. Lower band represents endogenous STAT1. Blot is probed with anti-pSTAT1(S727). Protein ladder only appears in the “white light” exposure, signal from ECL only appears in the chemiluminescence channel.
