# Supplementary material for: Human DUX4 and mouse Dux interact with STAT1 and broadly inhibit interferon-stimulated gene induction
Source: eLife journal article supplement (doi:10.7554/elife.82057), 2023-04-24
Supplement: fig6-data4 [file elife-82057-fig6-data4-v3.zip]

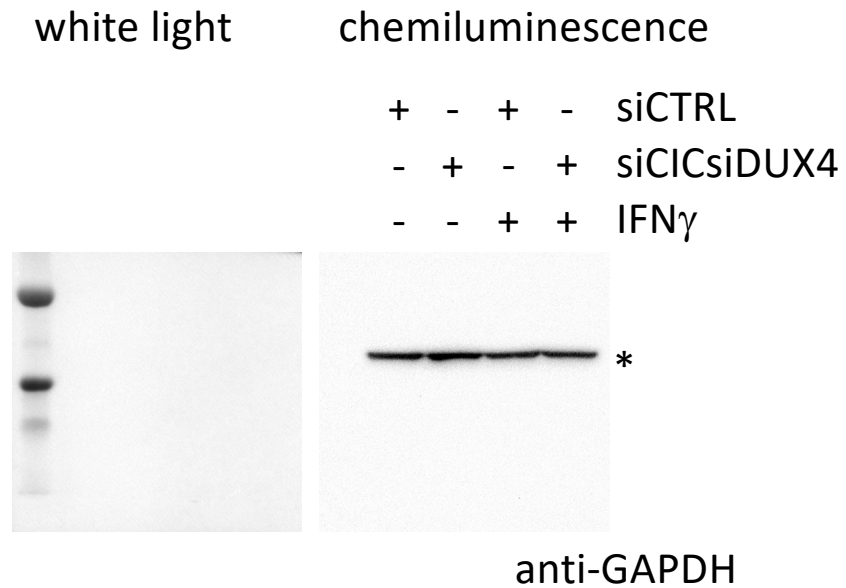

**Figure 6 Source Data 4. KitraSRS anti-GAPDH.** Western blot showing anti-GAPDH signal for Figure 6b. “\*” marks band of correct size. Blot was cut into two pieces, this piece was probed with anti-GAPDH. Protein ladder only appears in the “white light” exposure, signal from ECL only appears in the chemiluminescence channel.
