# Supplementary material for: Human DUX4 and mouse Dux interact with STAT1 and broadly inhibit interferon-stimulated gene induction
Source: eLife journal article supplement (doi:10.7554/elife.82057), 2023-04-24
Supplement: fig7-data1 [file elife-82057-fig7-data1-v2.zip]

white light:

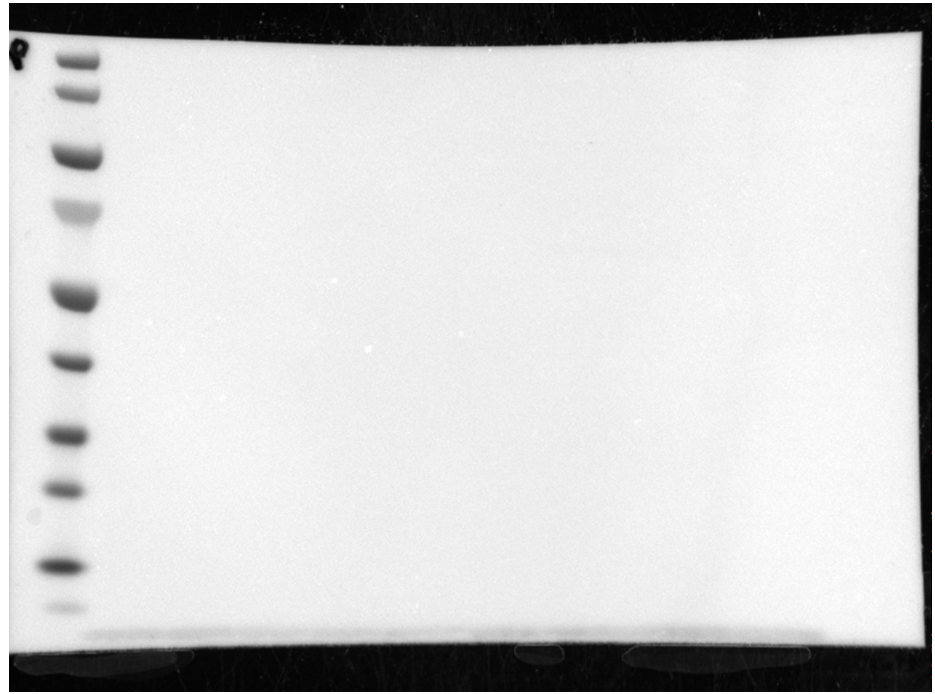

chemiluminescence:

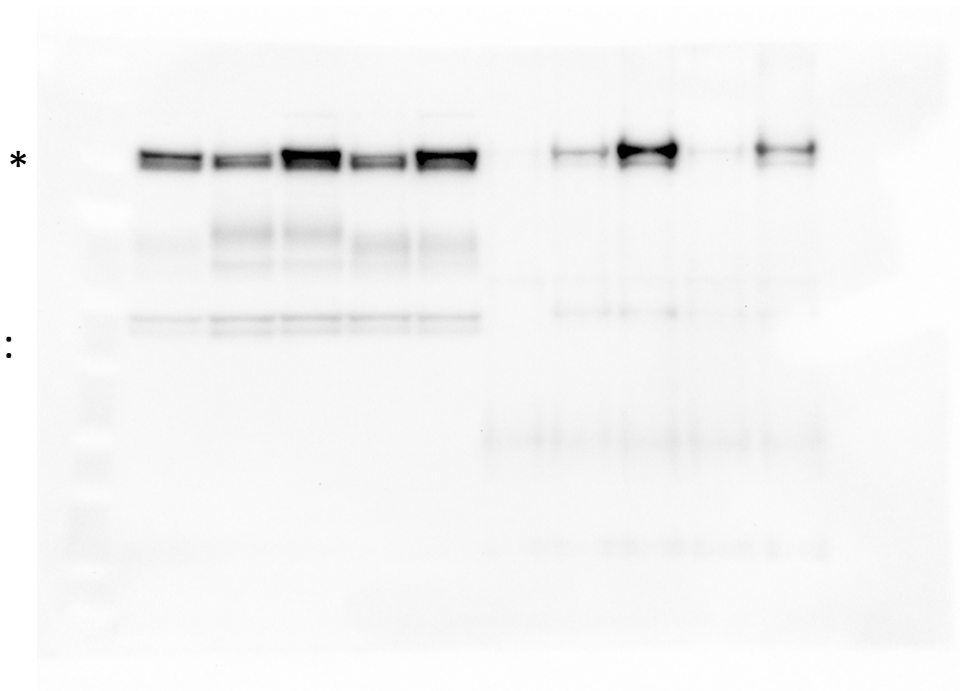

**Figure 7 Source Data 1. Mouse Dux co-IP, anti-STAT1.** Western blot showing anti-STAT1 signal for Figure 7b. \* marks correct size bands. Blot was probed intact for STAT1. Protein ladder only appears in the “white light” exposure, signal from ECL only appears in the chemiluminescence channel. The double-bands marked by the \* represent the alpha (upper) and beta (lower) isoforms of endogenous STAT1.
