# Supplementary material for: Human DUX4 and mouse Dux interact with STAT1 and broadly inhibit interferon-stimulated gene induction
Source: eLife journal article supplement (doi:10.7554/elife.82057), 2023-04-24
Supplement: fig7-data2 [file elife-82057-fig7-data2-v3.zip]

white light:

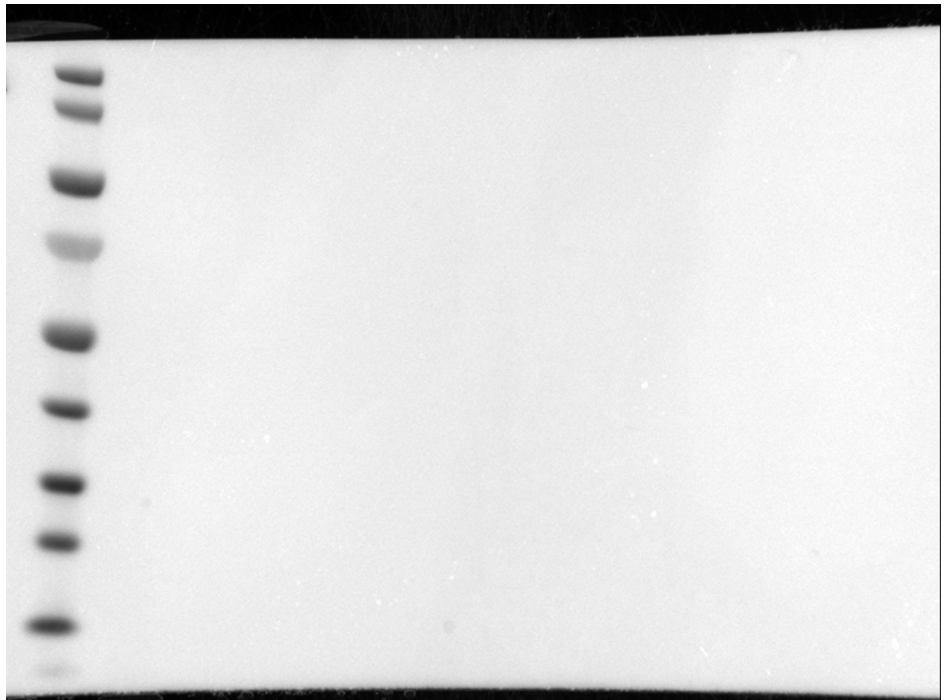

chemiluminescence:

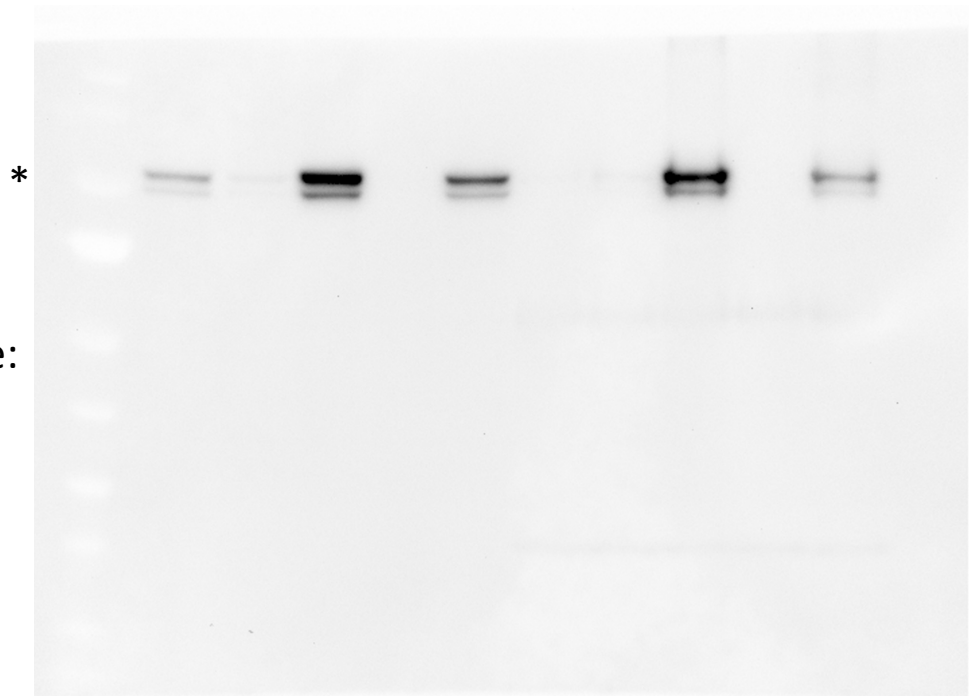

**Figure 7 Source Data 2. Mouse Dux co-IP, anti-pSTAT1(Y701).** Western blot showing anti-pSTAT1(Y701) signal for Figure 7b. \* marks correct size bands. Blot was stripped from previous exposure and re-probed with anti-pSTAT1(Y701). Protein ladder only appears in the “white light” exposure, signal from ECL only appears in the chemiluminescence channel. The double-bands marked by the \* represent the alpha (upper) and beta (lower) isoforms of endogenous STAT1.
