# Supplementary material for: Human DUX4 and mouse Dux interact with STAT1 and broadly inhibit interferon-stimulated gene induction
Source: eLife journal article supplement (doi:10.7554/elife.82057), 2023-04-24
Supplement: fig7-data3 [file elife-82057-fig7-data3-v3.zip]

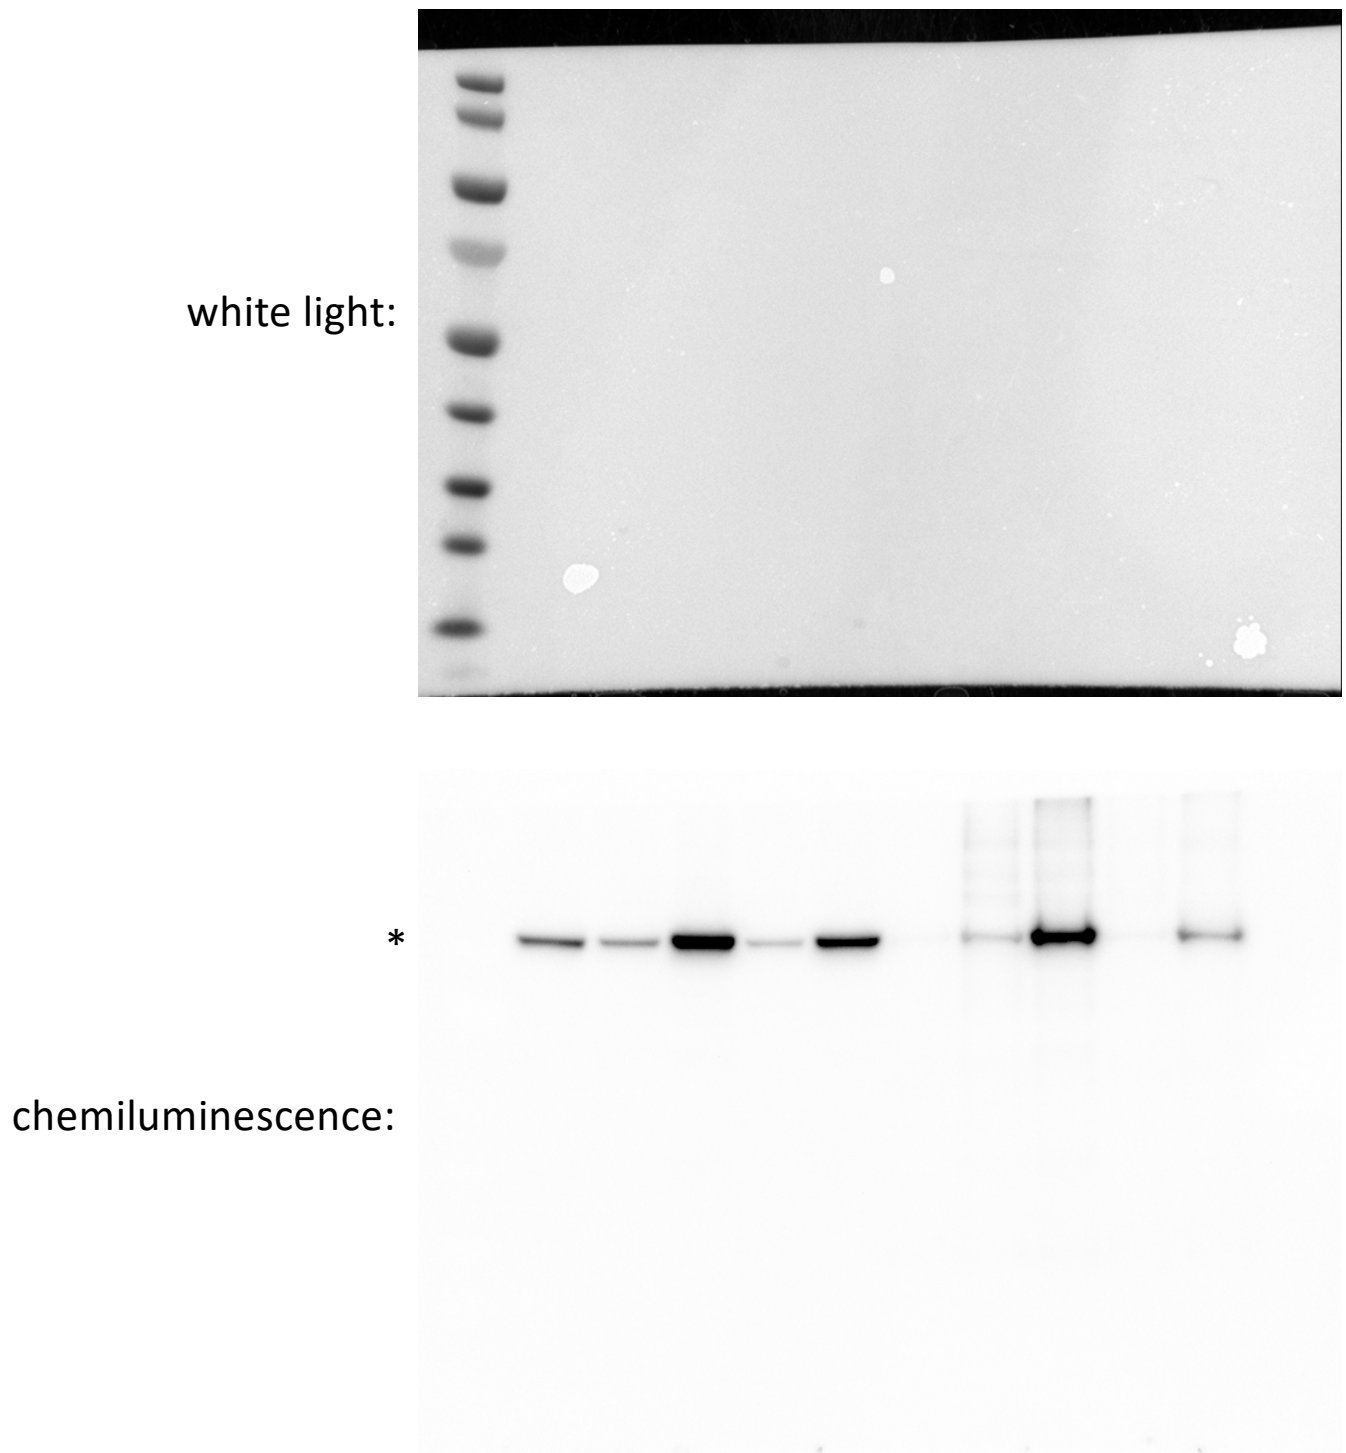

**Figure 7 Source Data 3. Mouse Dux co-IP, anti-pSTAT1(S727).** Western blot showing anti-pSTAT1(S727) signal for Figure 7b. \* marks correct size band. Blot was stripped from previous exposure and re-probed with anti-pSTAT1(S727). Protein ladder only appears in the “white light” exposure, signal from ECL only appears in the chemiluminescence channel. Only STAT1-alpha can be phosphorylated at S727, hence the lack of double-band.
