# Supplementary material for: Human DUX4 and mouse Dux interact with STAT1 and broadly inhibit interferon-stimulated gene induction
Source: eLife journal article supplement (doi:10.7554/elife.82057), 2023-04-24
Supplement: fig7-data4 [file elife-82057-fig7-data4-v2.zip]

white light:

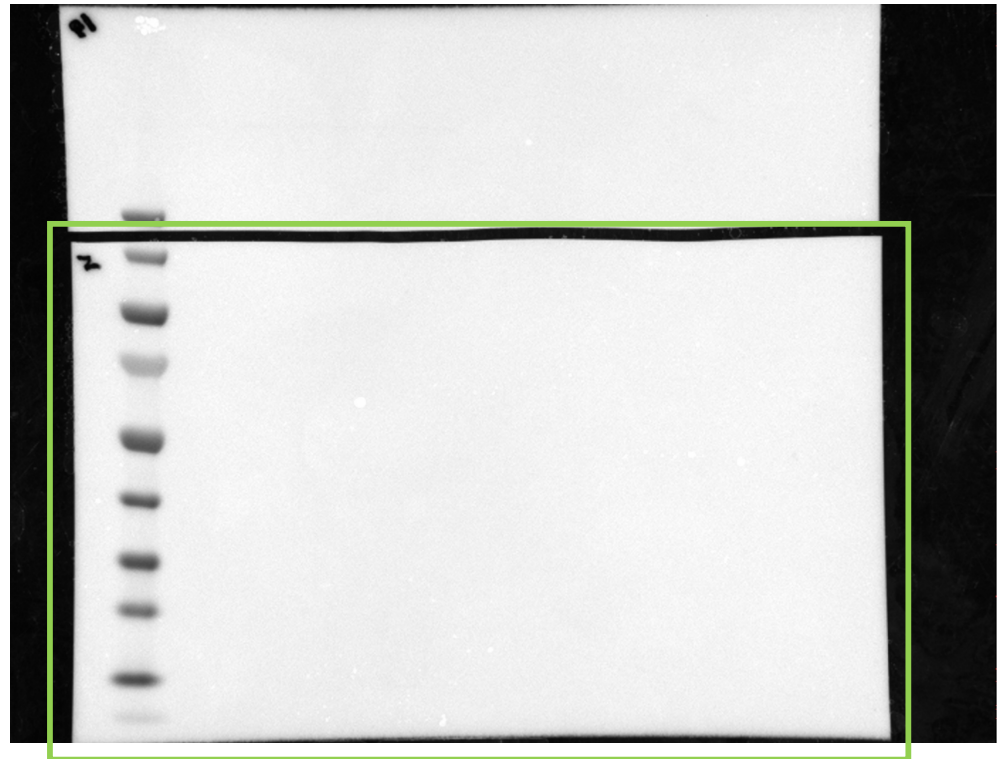

chemiluminescence:

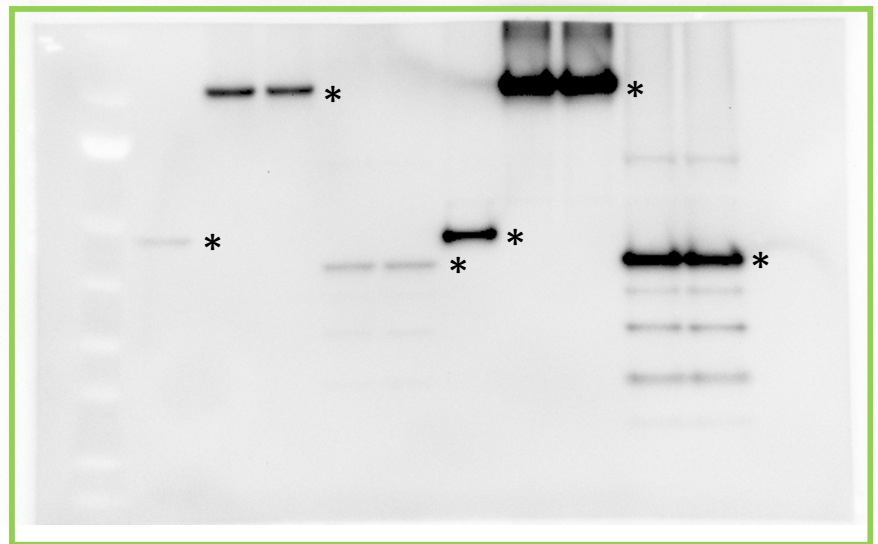

**Figure 7 Source Data 4. Mouse Dux co-IP, anti-FLAG.** Western blot showing anti-FLAG signal for Figure 7b. \* marks correct size band. Blot was physically cut to probe with multiple antibodies, multiple unrelated blots were imaged in this exposure/file. LOWER BLOT (boxed in green) is probed with anti-FLAG to detect inducible FLAG-tagged transgenes. NOTE: The image has been flipped in the manuscript and labeled appropriately. Protein ladder only appears in the “white light” exposure, signal from ECL only appears in the chemiluminescence channel.
