# Supplementary material for: Human DUX4 and mouse Dux interact with STAT1 and broadly inhibit interferon-stimulated gene induction
Source: eLife. 2023 Apr 24;12:e82057. doi: 10.7554/eLife.82057 (PMC10195082; doi:10.7554/eLife.82057)
Supplement: Figure 3—source data 1. — Western blot showing anti-FLAG signal. ‘*’ marks correct size band. Blot was physically cut to probe with multiple antibodies, multiple separate blots were imaged in this exposure/file. Bottom blot (boxed in green) is relevant for this figure and was probed with anti-FLAG. Signal from ECL only appears in the chemiluminescence channel. Protein ladder appears in white light channel. [file elife-82057-fig3-data1.zip]

Archive with 3 entries (3 files):
- Figure3-SourceData1-FLAG (bottom).mscn
- Figure3-SourceData1.pdf
- __MACOSX/._Figure3-SourceData1.pdf
