# Supplementary material for: Human DUX4 and mouse Dux interact with STAT1 and broadly inhibit interferon-stimulated gene induction
Source: eLife. 2023 Apr 24;12:e82057. doi: 10.7554/eLife.82057 (PMC10195082; doi:10.7554/eLife.82057)
Supplement: Figure 4—source data 5. — Western blot showing anti-MYC signal for Figure 4B. * marks correct size band. Blot was physically cut to probe with multiple antibodies, multiple separate blots were imaged in this exposure/file. Top blot (boxed in green) is relevant for this figure and was probed with anti-MYC to detect the INDUCIBLE MYC-tagged STAT1 or STAT1-mutant transgene. Signal from ECL only appears in the chemiluminescence channel. Protein ladder appears in white light channel. [file elife-82057-fig4-data5.zip]

Archive with 3 entries (3 files):
- Figure4-SourceData5-MYC(top).mscn
- Figure4-SourceData5.pdf
- __MACOSX/._Figure4-SourceData5.pdf
