# Supplementary material for: Human DUX4 and mouse Dux interact with STAT1 and broadly inhibit interferon-stimulated gene induction
Source: eLife. 2023 Apr 24;12:e82057. doi: 10.7554/eLife.82057 (PMC10195082; doi:10.7554/eLife.82057)
Supplement: Figure 4—source data 8. — Western blot showing anti-pSTAT1(S727) signal for Figure 4B. * marks correct size band for the INDUCIBLE MYC-tagged STAT1 or mutated-STAT1. Lower band represents endogenous STAT1. Blot is probed with anti-pSTAT1(S727). Protein ladder only appears in the ‘white light’ exposure. Signal from ECL only appears in the chemiluminescence channel. [file elife-82057-fig4-data8.zip]

Archive with 3 entries (3 files):
- Figure4-SourceData8-pSTAT1(S727).mscn
- Figure4-SourceData8.pdf
- __MACOSX/._Figure4-SourceData8.pdf
