# Supplementary material for: Human DUX4 and mouse Dux interact with STAT1 and broadly inhibit interferon-stimulated gene induction
Source: eLife. 2023 Apr 24;12:e82057. doi: 10.7554/eLife.82057 (PMC10195082; doi:10.7554/eLife.82057)
Supplement: Figure 4—source data 9. — Western blot showing anti-FLAG signal for Figure 4B. * marks correct size band. Blot was physically cut to probe with multiple antibodies, multiple unrelated blots were imaged in this exposure/file. Lower blot (boxed in green) is probed with anti-FLAG to detect the INDUCIBLE FLAG-tagged DUXB or DUX4-CTD transgene. Protein ladder only appears in the ‘white light’ exposure. Signal from ECL only appears in the chemiluminescence channel. [file elife-82057-fig4-data9.zip]

Archive with 3 entries (3 files):
- Figure4-SourceData9-FLAG(bottom).mscn
- Figure4-SourceData9.pdf
- __MACOSX/._Figure4-SourceData9.pdf
