# Supplementary material for: Human DUX4 and mouse Dux interact with STAT1 and broadly inhibit interferon-stimulated gene induction
Source: eLife. 2023 Apr 24;12:e82057. doi: 10.7554/eLife.82057 (PMC10195082; doi:10.7554/eLife.82057)
Supplement: Supplementary file 1. — Processed RNAseq data for MB135iDUX4, MB135iDUX4-F67A, and MB135iDUX4-CTD myoblasts untreated, treated with IFNγ, or treated with IFNγ following doxycycline-induction of the integrated transgene. Please see ‘Materials and methods’ for RNAseq analysis description. Raw data have been uploaded to GEO with the identifier GSE186244. [file elife-82057-supp1.xlsx]

## Sheet: RNAseq_DUX4
DUX4_geneID	DUX4_geneName	DUX4_baseMean	DUX4_log2FoldChange_IFNg_vs_untreated	DUX4_lfcSE_IFNg_vs_untreated	DUX4_stat_IFNg_vs_untreated	DUX4_pvalue_IFNg_vs_untreated	DUX4_padj_IFNg_vs_untreated	DUX4_log2FoldChange_dox_vs_untreated	DUX4_lfcSE_dox_vs_untreated	DUX4_stat_dox_vs_untreated	DUX4_pvalue_dox_vs_untreated	DUX4_padj_dox_vs_untreated	DUX4_log2FoldChange_doxIFNg_vs_IFNg	DUX4_lfcSE_doxIFNg_vs_IFNg	DUX4_stat_doxIFNg_vs_IFNg	DUX4_pvalue_doxIFNg_vs_IFNg	DUX4_padj_doxIFNg_vs_IFNg	DUX4_untreated_1	DUX4_untreated_2	DUX4_untreated_3	DUX4_dox_1	DUX4_dox_2	DUX4_dox_3	DUX4_IFNg_1	DUX4_IFNg_2	DUX4_IFNg_3	DUX4_doxIFNg_1	DUX4_doxIFNg_2	DUX4_doxIFNg_3
ENSG00000019582	CD74	1295.35	14.9527	1.18077	12.6635	9.42202e-37	3.6581e-35	7.05827	1.19723	5.8955	3.73548e-09	1.4462e-08	-3.48755	0.0926022	-37.6617	0	0	0	0	0	23.419	22.0839	14.3757	4795.09	4833.59	4588.94	432.066	479.943	354.664
ENSG00000131203	IDO1	1515.9	14.2285	1.17954	12.0627	1.66193e-33	5.85036e-32	1.36834	1.55944	0.877454	0.38024	0.484657	-3.55619	0.0738407	-48.1603	0	0	0.822135	0	0	1.11519	1.16231	0	5544.33	5764.49	5453.86	477.489	462.035	485.523
ENSG00000100336	APOL4	488.335	13.6354	1.18253	11.5308	9.23151e-31	2.95971e-29	1.43452	1.66902	0.859498	0.390066	0.49438	-5.21529	0.163385	-31.9203	1.39768e-223	5.89427e-222	0	0	0	1.11519	0	0	1868.26	1940.21	1897.03	55.3931	42.98	55.0341
ENSG00000138755	CXCL9	256.9	12.5738	1.1857	10.6046	2.83769e-26	7.74803e-25	4.78905	1.26273	3.7926	0.000149076	0.000402465	-3.0206	0.159885	-18.8924	1.31798e-79	1.93556e-78	0	0	0	3.34557	2.32462	6.63492	955.163	879.239	899.055	107.463	114.613	114.96
ENSG00000226025	LGALS17A	229.756	12.5439	1.18768	10.5617	4.48339e-26	1.21389e-24	0	1.67256	0	1	1	-5.06986	0.231608	-21.8898	3.25048e-106	6.20639e-105	0	0	0	0	0	0	919.235	933.579	824.644	28.8044	22.6839	28.1285
ENSG00000204287	HLA-DRA	137.946	11.749	1.19986	9.79197	1.21902e-22	2.91301e-21	2.32946	1.57469	1.47931	0.139057	0.213398	-3.80275	0.27239	-13.9607	2.70844e-44	2.52964e-43	0	0	0	0	0	2.21164	532.788	571.015	439.46	53.1774	32.235	24.4596
ENSG00000196126	HLA-DRB1	111.854	11.4172	1.20095	9.50683	1.96555e-21	4.43129e-20	2.33121	1.57501	1.48012	0.138841	0.21314	-3.43637	0.276172	-12.4429	1.52915e-35	1.23693e-34	0	0	0	0	2.32462	0	443.406	410.668	372.053	26.5887	34.6228	52.5881
ENSG00000204252	HLA-DOA	116.183	11.123	1.19734	9.28973	1.54684e-20	3.36985e-19	6.97439	1.21384	5.7457	9.15398e-09	3.45868e-08	-1.56431	0.230832	-6.77687	1.22811e-11	5.13385e-11	0	0	0	18.9582	19.7593	17.6931	369.797	345.638	284.511	119.649	130.134	88.0545
ENSG00000154451	GBP5	6078.29	11.1117	0.23782	46.7232	0	0	0.131693	0.354834	0.37114	0.710533	0.785506	-3.90394	0.0481497	-81.0792	0	0	9.04348	12.695	9.04443	13.3823	13.9477	6.63492	23195.6	22450.4	22662.8	1428.04	1620.11	1517.72
ENSG00000162654	GBP4	5438.6	10.7857	0.226013	47.7215	0	0	-0.33494	0.371187	-0.902347	0.366872	0.471401	-3.59956	0.0449474	-80.0838	0	0	18.087	7.14095	9.04443	14.4975	4.64925	7.74075	20224.9	19548.1	20460.3	1669.55	1622.49	1676.7
ENSG00000235750	KIAA0040	147.129	10.1171	1.19355	8.47641	2.32243e-17	4.42121e-16	10.0679	1.19406	8.43171	3.40649e-17	1.89835e-16	0.658797	0.200268	3.28957	0.0010034	0.0023601	0	0	0	147.205	160.399	173.614	129.692	187.072	181.212	240.406	280.564	265.387
ENSG00000130303	BST2	1216.4	9.58619	0.342024	28.0278	7.44236e-173	1.30587e-170	1.26953	0.424154	2.99309	0.0027617	0.00631647	-2.14293	0.0910748	-23.5293	2.04504e-122	4.46257e-121	1.64427	11.1081	2.46666	20.0734	9.29849	7.74075	4113.34	4148.55	3597.09	853.054	988.54	843.856
ENSG00000135114	OASL	201.935	8.54958	0.57524	14.8626	5.76118e-50	2.97727e-48	3.89281	0.598179	6.50777	7.62764e-11	3.24274e-10	-3.39897	0.213741	-15.9023	6.10785e-57	6.81407e-56	2.4664	1.58688	1.64444	42.3773	22.0839	19.9048	810.574	671.678	648.685	59.8246	78.7966	63.5949
ENSG00000010030	ETV7	211.568	8.45568	0.532318	15.8846	8.09765e-57	4.76079e-55	0.643385	0.716698	0.897707	0.369342	0.473759	-3.24804	0.182749	-17.7732	1.13934e-70	1.51105e-69	0	1.58688	4.93333	2.23038	6.97387	1.10582	757.12	753.633	771.243	86.4133	71.6333	81.9396
ENSG00000179583	CIITA	1976.96	8.36119	0.165828	50.421	0	0	-2.76722	0.508607	-5.44078	5.30484e-08	1.90873e-07	-4.6063	0.0750818	-61.3503	0	0	29.5968	15.0753	24.6666	3.34557	3.48693	3.31746	7580.84	7591.56	7539.1	313.525	296.084	322.867
ENSG00000111335	OAS2	1103.74	8.32178	0.787835	10.5628	4.43055e-26	1.20102e-24	-4.98979	1.41708	-3.52119	0.000429621	0.00109608	-3.79992	0.761266	-4.99158	5.98862e-07	1.91131e-06	31.2411	2.38032	4.93333	0	1.16231	0	4369.21	4251.88	3699.52	324.604	308.023	251.934
ENSG00000141574	SECTM1	1739.27	7.86193	0.159548	49.2761	0	0	-0.826785	0.280552	-2.94699	0.00320884	0.00726773	-2.80146	0.0686753	-40.7928	0	0	29.5968	22.2163	26.3111	14.4975	22.0839	7.74075	6307.58	6094.99	5742.74	840.868	889.447	873.207
ENSG00000168062	BATF2	592.884	7.61023	0.250389	30.3936	6.66553e-203	1.39698e-200	-2.07709	0.599817	-3.46288	0.00053443	0.00134718	-3.51595	0.127289	-27.6217	6.09969e-168	1.84204e-166	9.04348	15.0753	9.04443	0	2.32462	5.5291	2215.28	2138.86	2150.9	201.631	149.236	217.69
ENSG00000090339	ICAM1	4730.57	7.51535	0.126198	59.5521	0	0	3.98391	0.130532	30.5206	1.38743e-204	5.91793e-203	0.489816	0.0489768	10.001	1.50899e-23	9.51189e-23	46.8617	40.4654	36.9999	614.47	742.717	611.519	7794.66	7584.44	7361.39	10639.9	10887.1	10406.3
ENSG00000158714	SLAMF8	232.822	7.0778	0.340624	20.7789	6.7125e-96	7.09988e-94	-2.46726	0.899623	-2.74255	0.00609641	0.0132105	-3.35515	0.188352	-17.8132	5.58239e-71	7.42989e-70	5.75494	3.9672	9.04443	0	0	3.31746	865.781	856.078	803.634	98.5998	62.0822	85.6085
ENSG00000225492	GBP1P1	1220.72	7.05221	0.822227	8.57696	9.7414e-18	1.88459e-16	0.160048	0.835328	0.191599	0.848056	0.895127	-2.91631	0.812346	-3.58999	0.000330692	0.000827512	53.4387	0.793439	41.9333	37.9165	41.8432	27.6455	4370.09	4385.51	3999.79	550.608	583.812	555.233
ENSG00000133321	PLAAT4	679.434	6.91529	0.208439	33.1766	2.34181e-241	5.95584e-239	-1.24448	0.377154	-3.29966	0.000968035	0.00236448	-2.38106	0.123258	-19.3177	3.81015e-83	5.77302e-82	26.3083	9.52127	20.5555	7.80634	11.6231	4.42328	2086.46	2402.54	2283.97	423.204	505.015	371.786
ENSG00000140511	HAPLN3	524.229	6.81858	0.258319	26.3959	1.52599e-153	2.43245e-151	4.90209	0.26219	18.6967	5.26377e-78	8.57188e-77	-0.91697	0.115442	-7.94314	1.97122e-15	9.67855e-15	10.6877	2.38032	18.0889	312.254	292.903	318.476	1189.13	1192.81	1105.65	533.99	666.19	648.179
ENSG00000149131	SERPING1	733.056	6.79433	0.183083	37.1107	1.88973e-301	6.68343e-299	0.0629616	0.259626	0.242509	0.808386	0.865715	-2.42586	0.0980757	-24.7346	4.5398e-135	1.08629e-133	25.4862	23.0097	17.2666	18.9583	17.4347	32.0688	2571.93	2343.75	2387.27	432.066	484.719	442.718
ENSG00000163131	CTSS	1413.28	6.76755	0.139187	48.622	0	0	1.41117	0.163619	8.62472	6.42522e-18	3.66535e-17	-1.75106	0.074593	-23.4748	7.37297e-122	1.60356e-120	40.2846	38.8785	37.8222	78.0634	108.095	124.958	4300.86	4430.94	4013.79	1305.06	1238.06	1242.55
ENSG00000128284	APOL3	672.441	6.66063	0.181018	36.7954	2.18714e-296	7.38894e-294	-3.74522	0.669992	-5.58995	2.27129e-08	8.36171e-08	-4.48191	0.132404	-33.8502	3.60443e-251	1.76349e-249	18.9091	23.0097	33.7111	1.11519	0	4.42328	2589.46	2524.58	2530.83	89.7369	136.103	117.406
ENSG00000157601	MX1	746.584	6.65185	0.3777	17.6115	2.01087e-69	1.46826e-67	1.59563	0.39047	4.08644	4.38037e-05	0.000124995	-3.1526	0.351537	-8.96805	3.01816e-19	1.68214e-18	45.2174	20.6294	11.5111	60.2203	88.3357	85.1482	2915.44	2628.81	2229.69	343.437	259.074	271.501
ENSG00000102524	TNFSF13B	242.772	6.51561	1.0301	6.32525	2.52825e-10	3.06329e-09	1.38381	1.0454	1.32371	0.185599	0.271182	-3.17698	1.00436	-3.16318	0.00156053	0.00358124	20.5534	7.14095	0	14.4975	52.304	5.5291	910.472	840.934	781.749	87.5212	127.746	64.8179
ENSG00000134470	IL15RA	183.56	6.50767	0.346786	18.7656	1.44245e-78	1.1916e-76	-0.641877	0.541012	-1.18644	0.235449	0.329504	-2.95519	0.223706	-13.2102	7.66454e-40	6.70118e-39	9.04348	7.93439	4.11111	3.34557	5.81156	4.42328	641.449	659.207	620.672	115.218	74.0211	57.48
ENSG00000119922	IFIT2	907.613	6.43422	0.154845	41.5526	0	0	1.11028	0.183568	6.04832	1.46361e-09	5.81138e-09	-3.15551	0.104168	-30.2924	1.44415e-201	5.29919e-200	32.0632	40.4654	36.9999	75.833	77.8749	82.9366	3411.42	3006.52	3063.09	336.79	414.279	313.083
ENSG00000231389	HLA-DPA1	195.957	6.31898	0.317991	19.8716	7.17441e-88	6.71045e-86	-0.616208	0.488622	-1.26111	0.207268	0.296977	-3.14002	0.215374	-14.5794	3.79767e-48	3.75663e-47	10.6877	12.695	2.46666	3.34557	11.6231	2.21164	702.79	768.777	601.412	66.4718	90.7355	78.2707
ENSG00000100342	APOL1	1467.66	6.27578	0.123341	50.8813	0	0	-1.03217	0.198937	-5.18842	2.12081e-07	7.33091e-07	-2.8314	0.0879254	-32.2023	1.63668e-227	7.0841e-226	77.2806	44.4326	74.8221	33.4557	34.8693	27.6455	5324.38	5137.36	4723.76	706.816	655.445	771.7
ENSG00000162645	GBP2	6452.63	6.26646	0.0606268	103.361	0	0	-0.228463	0.0837589	-2.72762	0.00637927	0.013777	-2.26075	0.042305	-53.4393	0	0	295.146	239.619	282.022	224.153	212.703	258.762	21391.3	20290.2	21131.7	4419.26	4372.02	4314.67
ENSG00000183486	MX2	176.672	6.1373	0.588032	10.437	1.68011e-25	4.44788e-24	2.18434	0.605446	3.60782	0.000308779	0.000802256	-2.33806	0.530612	-4.40634	1.05132e-05	3.04468e-05	17.2648	6.34751	0	34.5709	39.5186	33.1746	640.573	475.698	544.51	124.081	96.705	107.622
ENSG00000117228	GBP1	16889.8	6.11383	0.0447438	136.641	0	0	-0.841768	0.06044	-13.9273	4.32266e-44	4.50277e-43	-2.90329	0.0379245	-76.5544	0	0	896.949	848.98	785.221	489.569	460.275	462.233	59391.9	58317.5	57590.3	7482.5	8186.49	7765.92
ENSG00000185885	IFITM1	356.33	6.05083	0.866828	6.98042	2.94294e-12	4.11447e-11	-1.99409	0.962008	-2.07285	0.0381866	0.0697778	-2.43001	0.8506	-2.85681	0.00427915	0.00917297	6.57708	44.4326	2.46666	8.92153	1.16231	3.31746	1112.9	1226.66	1210.7	200.523	213.706	244.596
ENSG00000137959	IFI44L	746.29	6.00558	0.375075	16.0117	1.05919e-57	6.34251e-56	-2.81355	0.520674	-5.40367	6.52901e-08	2.33488e-07	-3.53727	0.361644	-9.78107	1.35767e-22	8.33413e-22	70.7036	30.1507	25.4889	6.69115	1.16231	9.95239	2760.33	2679.59	2672.65	231.543	249.523	217.69
ENSG00000129682	FGF13	136.018	5.96194	0.364828	16.3418	4.97823e-60	3.13878e-58	2.76695	0.38828	7.12617	1.03203e-12	4.82841e-12	-1.5502	0.211735	-7.32139	2.45421e-13	1.11056e-12	6.57708	8.72783	2.46666	43.4925	31.3824	46.4445	354.024	407.995	351.043	120.757	149.236	110.068
ENSG00000089127	OAS1	196.337	5.95477	0.700636	8.49909	1.9109e-17	3.65314e-16	-5.81947	1.37026	-4.24697	2.16684e-05	6.3592e-05	-3.94323	0.678245	-5.81388	6.10414e-09	2.20052e-08	26.3083	4.76063	4.11111	0	0	0	826.348	683.259	669.695	62.0403	48.9494	30.5745
ENSG00000204257	HLA-DMA	157.673	5.89324	0.329385	17.8916	1.37076e-71	1.0377e-69	0.984775	0.389275	2.52977	0.0114139	0.0234782	-2.87503	0.238156	-12.072	1.48424e-33	1.15989e-32	17.2648	6.34751	3.28888	15.6127	25.5709	12.164	535.417	565.67	493.736	83.0897	75.215	58.703
ENSG00000133106	EPSTI1	1542.28	5.78448	0.223412	25.8916	8.28981e-148	1.30305e-145	-0.435609	0.245876	-1.77166	0.0764505	0.128416	-3.38983	0.214003	-15.8401	1.64477e-56	1.82719e-55	141.407	77.757	78.9332	57.9899	90.6603	71.8784	5804.59	5401.04	5216.62	563.902	513.372	489.192
ENSG00000185338	SOCS1	183.659	5.72824	0.334236	17.1383	7.68684e-66	5.37011e-64	3.76041	0.342356	10.9839	4.56661e-28	3.49485e-27	-1.42123	0.222682	-6.38233	1.74409e-10	6.87508e-10	13.9763	3.17376	8.22221	162.818	84.8487	93.9948	454.798	473.025	409.696	167.287	174.308	157.764
ENSG00000140105	WARS	23883.4	5.63181	0.0411117	136.988	0	0	-0.787488	0.0506423	-15.55	1.5911e-54	1.91358e-53	-2.136	0.036999	-57.7313	0	0	1517.66	1574.18	1497.26	955.719	868.247	834.895	76842.4	77674.1	73059.8	17030.1	18027.7	16718.1
ENSG00000119917	IFIT3	3120.42	5.55316	0.219636	25.2835	4.85316e-141	7.13321e-139	-0.676444	0.23193	-2.91658	0.0035389	0.00796517	-2.66149	0.21495	-12.3819	3.27393e-35	2.63288e-34	213.755	195.979	259	110.404	205.729	102.841	10540.1	10824.3	10030.5	1611.94	1580.71	1769.65
ENSG00000137496	IL18BP	1415.6	5.51317	0.106383	51.8238	0	0	2.27934	0.114044	19.9865	7.22467e-89	1.32248e-87	-1.79267	0.0747113	-23.9946	3.16924e-127	7.17807e-126	80.5692	77.757	104.422	424.888	442.841	406.942	4000.29	4128.95	3858.84	1101.22	1099.57	1260.89
ENSG00000164171	ITGA2	348.522	5.36594	0.336073	15.9666	2.18491e-57	1.30489e-55	0.220979	0.36736	0.601532	0.547486	0.645744	-3.6297	0.319758	-11.3514	7.30073e-30	5.28699e-29	28.7747	25.3901	35.3555	14.4975	55.791	34.2804	1340.73	1185.68	1163.43	79.7661	114.613	103.953
ENSG00000068079	IFI35	1100.41	5.27093	0.110477	47.7108	0	0	-1.74267	0.201362	-8.65439	4.9556e-18	2.83718e-17	-2.26383	0.0846662	-26.7383	1.6889e-157	4.76611e-156	92.9012	93.6258	88.7999	21.1886	27.8955	33.1746	3775.08	3601.58	3255.68	694.63	746.18	774.146
ENSG00000173193	PARP14	8290.93	5.23731	0.114367	45.7938	0	0	-1.72175	0.128647	-13.3835	7.5466e-41	7.43643e-40	-2.68669	0.111827	-24.0255	1.50581e-127	3.42233e-126	830.356	747.42	638.866	195.158	199.918	276.455	28804.7	27105.9	27705.2	4352.79	4260.99	4373.37
ENSG00000125347	IRF1	5784.17	5.23473	0.0496825	105.364	0	0	-0.966753	0.0736099	-13.1335	2.11747e-39	2.04039e-38	-2.65866	0.0404397	-65.7438	0	0	522.878	499.073	516.355	235.305	280.117	272.032	19584.3	19556.2	18771.6	3016.71	3105.3	3050.11
ENSG00000115267	IFIH1	507.709	4.99542	0.280474	17.8106	5.84389e-71	4.39457e-69	-2.48297	0.394191	-6.29891	2.99755e-10	1.23525e-09	-3.55679	0.272083	-13.0724	4.73306e-39	4.08514e-38	88.7905	40.4654	41.1111	7.80634	11.6231	11.0582	1943.63	1765.6	1721.07	165.072	137.297	158.987
ENSG00000168394	TAP1	4857.41	4.95985	0.0654552	75.7747	0	0	-1.77445	0.0988857	-17.9445	5.29981e-72	8.00307e-71	-2.00123	0.0577517	-34.6524	4.10985e-263	2.11307e-261	411.067	507.801	531.155	141.629	152.263	130.487	15462.2	15499.4	14177.4	3741.25	3686.73	3847.49
ENSG00000224389	C4B	393.027	4.91413	0.16854	29.1571	6.78326e-187	1.26892e-184	-0.5942	0.235987	-2.51794	0.0118044	0.0242244	-2.55192	0.137399	-18.5731	5.30229e-77	7.52605e-76	42.751	38.0851	46.8666	18.9582	27.8955	37.5979	1317.95	1332.67	1196.7	188.337	245.941	222.582
ENSG00000187608	ISG15	890.465	4.887	0.301779	16.1939	5.56461e-59	3.44139e-57	-1.80805	0.34275	-5.27512	1.32668e-07	4.64897e-07	-2.99159	0.296181	-10.1006	5.49257e-24	3.50769e-23	154.561	72.203	82.2221	24.5342	39.5186	24.3281	3118.74	3241.69	2778.58	331.251	460.841	357.11
ENSG00000240065	PSMB9	852.126	4.71312	0.123262	38.2364	0	0	-1.5138	0.19144	-7.90743	2.62766e-15	1.36462e-14	-2.2513	0.105628	-21.3135	8.51199e-101	1.5323e-99	114.277	83.3111	111.822	39.0317	36.0317	33.1746	2712.14	2904.07	2489.69	574.981	626.792	500.199
ENSG00000244731	C4A	367.214	4.70711	0.184862	25.4628	5.09359e-143	7.7901e-141	-0.638723	0.246388	-2.59235	0.00953241	0.0199315	-2.42587	0.159297	-15.2286	2.28432e-52	2.39968e-51	41.1067	33.3244	60.8444	23.419	25.5709	37.5979	1225.94	1223.99	1077.64	183.905	253.104	220.136
ENSG00000182326	C1S	640.661	4.704	0.159203	29.5472	7.133e-192	1.42881e-189	2.41647	0.165587	14.5933	3.09807e-48	3.42959e-47	-1.27577	0.130863	-9.74886	1.86559e-22	1.14147e-21	41.1067	48.3998	88.7999	308.908	301.039	340.593	1703.52	1536.66	1401.54	615.972	647.088	654.294
ENSG00000184979	USP18	227.469	4.58224	0.223682	20.4855	2.89781e-93	2.94134e-91	-0.123154	0.273881	-0.449662	0.652954	0.737431	-3.88312	0.219451	-17.6947	4.60358e-70	6.04749e-69	41.1067	24.5966	33.7111	45.7228	18.597	26.5397	784.285	873.894	719.594	43.2066	60.8883	57.48
ENSG00000261971	NA	251.02	4.57867	0.207763	22.038	1.2455e-107	1.50759e-105	0.421309	0.245632	1.71521	0.0863074	0.142578	-2.36455	0.176735	-13.3791	8.01578e-41	7.10761e-40	35.3518	25.39	36.9999	53.5292	38.3563	38.7037	765.883	760.76	805.385	180.582	158.787	112.514
ENSG00000185745	IFIT1	587.919	4.4992	0.347397	12.9512	2.31353e-38	9.3847e-37	-3.81002	0.486156	-7.83702	4.6135e-15	2.379e-14	-4.27339	0.349416	-12.2301	2.147e-34	1.7016e-33	143.874	84.1045	55.911	6.69115	3.48693	9.95239	2281.88	2242.19	1895.28	140.699	93.1233	97.8383
ENSG00000172183	ISG20	125.616	4.4439	0.326153	13.6252	2.83621e-42	1.27376e-40	0.919019	0.356724	2.57627	0.00998715	0.0208001	-3.09436	0.305233	-10.1377	3.7578e-24	2.41155e-23	20.5534	9.52127	25.4889	33.4557	33.707	37.5979	456.55	367.909	381.682	63.1482	20.2961	57.48
ENSG00000128335	APOL2	3352.28	4.38392	0.0658327	66.5918	0	0	-3.33757	0.13441	-24.8312	4.12889e-136	1.15165e-134	-3.89901	0.0660752	-59.0086	0	0	568.917	633.958	517.177	80.2938	55.791	34.2804	11847.5	12343.2	11737.6	800.985	774.834	832.849
ENSG00000204642	HLA-F	376.679	4.34141	0.173481	25.0253	3.246e-138	4.67983e-136	0.221519	0.2049	1.08111	0.27965	0.377546	-1.87893	0.149599	-12.5598	3.51301e-36	2.8879e-35	64.9486	52.367	44.3999	76.9482	73.2256	38.7037	1062.07	1166.08	1049.63	269.211	298.472	324.089
ENSG00000112139	MDGA1	450.557	4.31893	0.142052	30.404	4.87072e-203	1.03036e-200	-1.35783	0.215556	-6.29921	2.99174e-10	1.23305e-09	-2.91346	0.129489	-22.4998	4.17153e-112	8.31553e-111	80.5692	58.7145	86.3332	23.419	27.8955	36.4921	1461.66	1507.27	1527.6	206.062	179.083	211.575
ENSG00000101347	SAMHD1	1552.32	4.21763	0.0788667	53.4779	0	0	-0.839883	0.107364	-7.82273	5.16899e-15	2.65986e-14	-2.23951	0.0695307	-32.2089	1.32483e-227	5.75329e-226	277.059	242.792	253.244	162.818	142.964	126.064	4960.71	4586.83	4830.56	1024.77	968.244	1051.76
ENSG00000002549	LAP3	3799.3	4.15506	0.0672319	61.8019	0	0	0.520633	0.0731855	7.11389	1.12821e-12	5.27017e-12	-1.95016	0.0623467	-31.2793	8.91354e-215	3.58082e-213	701.281	597.46	535.266	868.734	872.896	889.08	11034.3	11331.2	10305.4	2749.72	2771.02	2935.15
ENSG00000159403	C1R	2724.55	4.12417	0.0818597	50.381	0	0	0.51565	0.0887515	5.81004	6.24574e-09	2.38589e-08	-1.75871	0.07596	-23.1531	1.35216e-118	2.86726e-117	449.708	416.556	440.71	605.549	534.663	726.524	8131.15	7641.45	7014.73	2309.89	2101.24	2322.44
ENSG00000132530	XAF1	407.114	4.06608	0.153082	26.5615	1.89399e-155	3.0842e-153	-2.33646	0.265202	-8.8101	1.25037e-18	7.28057e-18	-3.41938	0.151373	-22.5892	5.53334e-113	1.11657e-111	92.0791	76.1702	82.2221	33.4557	9.29849	6.63492	1409.96	1394.13	1389.29	130.728	113.419	147.98
ENSG00000135899	SP110	174.445	4.05184	0.232028	17.4627	2.75351e-68	1.98489e-66	-2.42807	0.418383	-5.80345	6.49626e-09	2.47704e-08	-2.72871	0.216609	-12.5974	2.18316e-36	1.80371e-35	33.7075	29.3572	40.2888	0	11.6231	7.74075	650.212	488.169	574.274	96.3841	94.3172	67.2639
ENSG00000221963	APOL6	4696.6	4.05038	0.0505506	80.1252	0	0	-2.29575	0.0837858	-27.4003	2.72212e-165	9.29167e-164	-1.95252	0.046012	-42.435	0	0	851.731	814.862	889.643	172.855	138.315	207.894	14428.2	13626	14289.5	3648.19	3637.78	3654.26
ENSG00000111331	OAS3	1927.96	4.04497	0.156684	25.8161	5.85118e-147	9.13389e-145	-2.53163	0.19055	-13.2859	2.79384e-40	2.72717e-39	-2.70329	0.154645	-17.4806	2.01352e-68	2.59447e-67	416	385.611	342.866	63.5659	94.1472	40.9154	6495.99	6215.25	6180.45	985.998	872.733	1041.98
ENSG00000156587	UBE2L6	1547.56	4.02106	0.263345	15.2692	1.22746e-52	6.74358e-51	-1.172	0.274858	-4.26401	2.00793e-05	5.90439e-05	-1.8339	0.260708	-7.0343	2.00257e-12	8.68499e-12	295.146	321.343	218.711	81.409	99.9588	189.095	4618.96	4645.62	4296.55	1285.12	1327.6	1191.18
ENSG00000137767	SQOR	131.627	3.97476	0.2499	15.9054	5.81448e-57	3.42736e-55	-0.657251	0.324588	-2.02488	0.04288	0.0773489	-3.34252	0.247138	-13.5249	1.11495e-41	1.00285e-40	29.5968	35.7048	18.0889	20.0734	16.2724	16.5873	448.664	440.956	423.702	32.128	53.725	44.0273
ENSG00000138496	PARP9	1159.88	3.9687	0.108358	36.6259	1.1081e-293	3.63504e-291	-1.13605	0.138012	-8.23157	1.84777e-16	1.00261e-15	-2.35406	0.102212	-23.0312	2.26983e-117	4.7823e-116	275.415	221.37	193.222	84.7545	137.153	92.8889	3767.2	3459.05	3575.21	735.621	669.771	706.882
ENSG00000162772	ATF3	1166.1	3.93865	0.145894	26.9966	1.62006e-160	2.67665e-158	5.52826	0.144024	38.3842	0	0	1.64485	0.0913394	18.0081	1.68313e-72	2.27591e-71	38.6403	44.4326	43.5777	2012.92	2032.88	1802.49	733.46	641.39	568.146	2130.42	1928.13	2016.69
ENSG00000110446	SLC15A3	355.054	3.91427	0.309819	12.634	1.37073e-36	5.27662e-35	-0.581608	0.336006	-1.73095	0.0834613	0.138589	-1.74321	0.300434	-5.80231	6.54076e-09	2.35372e-08	78.1028	72.203	50.1555	31.2254	74.3879	28.7513	1029.65	1105.51	887.674	300.231	257.88	344.88
ENSG00000239713	APOBEC3G	176.931	3.85183	0.207021	18.606	2.87349e-77	2.33962e-75	-1.82116	0.330093	-5.51711	3.44626e-08	1.2515e-07	-3.29609	0.206456	-15.9651	2.23565e-57	2.51014e-56	41.9289	39.672	41.9333	16.7279	11.6231	6.63492	540.675	684.149	558.517	64.256	64.47	52.5881
ENSG00000059378	PARP12	427.724	3.85047	0.151227	25.4615	5.26245e-143	7.99433e-141	-1.6522	0.220763	-7.48405	7.20667e-14	3.55787e-13	-2.48611	0.142206	-17.4825	1.94769e-68	2.51087e-67	106.055	96.0061	78.111	10.0367	41.8432	37.5979	1385.42	1348.7	1307.87	257.024	230.42	233.589
ENSG00000177409	SAMD9L	4446.99	3.81904	0.0586639	65.1002	0	0	-0.504702	0.0675012	-7.47692	7.60824e-14	3.74927e-13	-2.34664	0.0562064	-41.7504	0	0	1030.13	932.291	907.732	651.272	653.219	717.678	14175.8	13175.2	13154	2458.35	2768.63	2739.47
ENSG00000164342	TLR3	170.135	3.75589	0.279855	13.4208	4.5652e-41	1.98337e-39	-2.81935	0.464195	-6.07362	1.25058e-09	4.98975e-09	-2.50014	0.269714	-9.26961	1.86826e-20	1.08021e-19	38.6403	26.1835	55.0888	2.23038	12.7854	2.21164	601.139	581.705	435.083	70.9032	83.5722	132.082
ENSG00000204267	TAP2	1299.87	3.70059	0.0863805	42.8406	0	0	-1.12491	0.115252	-9.76042	1.66462e-22	1.09541e-21	-1.77958	0.0789839	-22.5309	2.06616e-112	4.13437e-111	261.439	312.615	280.377	156.127	105.77	129.381	3694.47	3624.74	3794.94	1004.83	1130.61	1103.13
ENSG00000115415	STAT1	11578.3	3.69913	0.088001	42.0351	0	0	-0.1561	0.0898904	-1.73656	0.0824647	0.137132	-1.70367	0.087165	-19.5453	4.52024e-85	7.01893e-84	2867.61	2330.33	2164.09	2220.35	2200.26	2186.21	32713	31349.7	31553.6	9859.98	9779.14	9715.35
ENSG00000116663	FBXO6	155.878	3.69096	0.265649	13.8942	6.87329e-44	3.20117e-42	2.87966	0.271595	10.6027	2.89369e-26	2.1254e-25	-0.0472446	0.208733	-0.22634	0.820937	0.868576	30.419	7.93439	17.2666	129.362	125.53	152.603	247.116	244.975	223.232	239.298	238.778	214.021
ENSG00000126709	IFI6	1508.14	3.64221	0.114147	31.9082	2.05786e-223	4.80203e-221	-0.113681	0.125099	-0.908726	0.363495	0.468086	-1.2063	0.108038	-11.1655	6.01347e-29	4.26775e-28	380.648	244.379	288.6	297.756	266.169	279.773	4037.97	3978.4	3384.37	1778.12	1702.49	1459.01
ENSG00000130775	THEMIS2	121.607	3.61777	0.236985	15.2658	1.29221e-52	7.06499e-51	1.14019	0.260782	4.3722	1.22998e-05	3.692e-05	-1.85226	0.20876	-8.87264	7.14307e-19	3.93438e-18	26.3083	19.0425	32.0666	54.6444	61.6025	54.1852	328.611	319.804	300.268	85.3054	95.5111	81.9396
ENSG00000168404	MLKL	734.848	3.60275	0.117366	30.6968	6.28332e-207	1.3545e-204	-1.65161	0.160805	-10.2709	9.53086e-25	6.68919e-24	-3.23599	0.118812	-27.2363	2.41219e-163	7.08107e-162	203.889	176.143	217.889	55.7596	45.3302	88.4657	2375.64	2596.74	2288.34	272.534	263.849	233.589
ENSG00000130589	HELZ2	2753.49	3.59673	0.0825115	43.5907	0	0	0.429379	0.0877405	4.89373	9.8941e-07	3.2602e-06	-1.58278	0.0787445	-20.1002	7.35675e-90	1.19091e-88	695.526	554.614	537.733	741.602	888.006	778.498	7536.15	7338.57	6751.23	2408.49	2248.09	2563.36
ENSG00000197536	C5orf56	177.049	3.59537	0.195243	18.4149	9.97924e-76	7.87039e-74	0.359217	0.22864	1.57111	0.116158	0.183504	-1.76323	0.17217	-10.2412	1.29585e-24	8.40641e-24	33.7075	45.226	39.4666	51.2988	43.0055	57.5027	449.54	498.859	484.106	146.238	131.328	144.312
ENSG00000151468	CCDC3	118.564	3.58466	0.24786	14.4625	2.09211e-47	1.02722e-45	0.0273292	0.299367	0.09129	0.927262	0.95234	-1.37016	0.214867	-6.3768	1.80826e-10	7.12056e-10	27.1304	30.9441	18.0889	32.3405	22.0839	23.2222	319.848	299.315	295.891	117.433	132.522	103.953
ENSG00000138646	HERC5	319.058	3.53805	0.232967	15.1869	4.31649e-52	2.34865e-50	4.30647	0.231544	18.599	3.2754e-77	5.27345e-76	1.46893	0.164442	8.93282	4.15285e-19	2.30477e-18	27.9526	19.836	11.5111	380.28	391.699	401.413	262.889	233.395	192.592	635.913	530.087	741.125
ENSG00000107201	DDX58	1378.82	3.51026	0.0993068	35.3477	1.08817e-273	3.15778e-271	-0.580753	0.114649	-5.0655	4.0732e-07	1.38318e-06	-1.85309	0.0946784	-19.5725	2.65371e-85	4.13283e-84	401.202	341.972	277.088	247.572	231.3	203.471	4207.98	3703.14	3714.4	1100.11	1029.13	1088.45
ENSG00000137628	DDX60	1330.83	3.50251	0.0743663	47.0981	0	0	-1.88497	0.114815	-16.4175	1.43368e-60	1.88275e-59	-2.68332	0.072491	-37.0159	6.35318e-300	3.92746e-298	392.98	365.775	352.733	120.441	90.6603	89.5715	4260.55	4139.64	4195.88	629.266	675.741	656.74
ENSG00000138642	HERC6	405.907	3.49782	0.147647	23.6904	4.52898e-124	5.92564e-122	1.34702	0.158492	8.49899	1.91248e-17	1.07353e-16	-0.813566	0.12679	-6.41662	1.3933e-10	5.52464e-10	90.4348	81.7242	56.7333	187.352	187.132	207.894	833.358	918.435	835.149	446.469	496.658	529.55
ENSG00000078018	MAP2	979.262	3.44315	0.117954	29.1907	2.54843e-187	4.84737e-185	4.15808	0.117278	35.455	2.43268e-275	1.53106e-273	0.926599	0.0846601	10.9449	7.02708e-28	4.88161e-27	79.747	78.5505	74.8221	1244.55	1395.94	1521.61	831.605	845.388	858.785	1614.16	1532.95	1673.04
ENSG00000141682	PMAIP1	2944.79	3.40316	0.0775349	43.892	0	0	4.03059	0.0772752	52.1589	0	0	0.916051	0.0623391	14.6947	6.97524e-49	6.97869e-48	207.178	276.117	254.066	4148.51	3927.45	3984.27	2720.9	2645.73	2440.67	4740.54	5208.94	4783.07
ENSG00000144857	BOC	257.198	3.39641	0.168686	20.1345	3.68299e-90	3.57787e-88	-0.779045	0.213624	-3.64681	0.000265517	0.000695284	-2.66888	0.165817	-16.0954	2.74934e-58	3.12563e-57	80.5692	72.9964	70.711	41.2621	39.5186	49.7619	842.121	778.576	740.604	151.777	118.195	100.284
ENSG00000184371	CSF1	6328.43	3.36003	0.0415005	80.9635	0	0	-3.36533	0.073978	-45.4909	0	0	-4.35611	0.0471116	-92.4637	0	0	2177.83	2107.37	2114.75	241.996	187.132	191.307	21874.1	22445.1	21390.8	1026.99	1076.89	1106.8
ENSG00000008517	IL32	2538.42	3.35885	0.083454	40.248	0	0	-0.643291	0.0929073	-6.92401	4.3903e-12	1.99795e-11	-1.9452	0.081208	-23.9533	8.52703e-127	1.92301e-125	726.767	681.564	683.266	373.589	528.852	437.905	7171.61	7888.21	6397.56	1881.15	1821.87	1868.71
ENSG00000175899	A2M	1115.62	3.35453	0.0886607	37.8355	0	0	0.922789	0.0975487	9.45978	3.08593e-21	1.95404e-20	-0.39022	0.0755433	-5.16551	2.39782e-07	7.86589e-07	240.885	193.599	205.555	389.202	398.673	424.635	2283.63	2091.64	2167.54	1667.33	1729.94	1594.76
ENSG00000163840	DTX3L	3009.74	3.34558	0.0576674	58.0151	0	0	-2.20319	0.0843972	-26.105	3.20316e-150	9.85027e-149	-2.73668	0.0573924	-47.6837	0	0	1013.69	923.563	860.865	217.462	202.242	187.99	9592.82	9333.12	9516.67	1370.43	1474.45	1423.55
ENSG00000140853	NLRC5	1168.3	3.33893	0.087089	38.3393	0	0	-2.60977	0.140252	-18.6078	2.77832e-77	4.48653e-76	-3.85442	0.0955202	-40.3519	0	0	396.269	412.588	360.955	64.6811	69.7387	57.5027	4069.52	3987.31	3782.68	264.779	317.574	236.035
ENSG00000185215	TNFAIP2	2752.23	3.32541	0.0710019	46.8355	0	0	-2.79995	0.104015	-26.9188	1.32468e-159	4.3144e-158	-3.966	0.0761499	-52.0814	0	0	862.419	915.629	1018.73	149.436	152.263	100.63	9916.17	9277.89	8839.97	613.756	564.709	615.159
ENSG00000205220	PSMB10	257.027	3.32207	0.222806	14.9101	2.83165e-50	1.47343e-48	-1.10542	0.266412	-4.14928	3.3352e-05	9.62901e-05	-2.28116	0.2178	-10.4737	1.14151e-25	7.60033e-25	69.8814	113.462	44.3999	43.4925	36.0317	26.5397	816.708	752.743	711.715	150.669	171.92	146.757
ENSG00000123609	NMI	490.946	3.24242	0.120516	26.9045	1.94406e-159	3.18868e-157	-0.16853	0.142788	-1.18029	0.237887	0.332261	-1.76347	0.112116	-15.7289	9.58441e-56	1.05449e-54	130.719	140.439	145.533	134.938	117.393	118.323	1404.7	1281	1257.98	434.282	367.718	358.333
ENSG00000204264	PSMB8	1192.91	3.22722	0.0902232	35.7693	3.3192e-280	1.01527e-277	-1.17443	0.114378	-10.268	9.82676e-25	6.89507e-24	-1.61282	0.0852949	-18.9087	9.6635e-80	1.42235e-78	325.565	363.395	342.866	157.242	130.179	169.191	3227.4	3327.21	3110.36	946.115	1181.95	1033.42
ENSG00000157873	TNFRSF14	344.291	3.20654	0.159725	20.0754	1.21098e-89	1.1664e-87	-2.83094	0.270937	-10.4487	1.48545e-25	1.06697e-24	-2.50891	0.158042	-15.875	9.4474e-57	1.05219e-55	129.075	115.049	100.311	11.1519	9.29849	27.6455	1091.87	1109.96	977.842	169.503	164.757	225.028
ENSG00000151572	ANO4	1065.4	3.08939	0.0869154	35.5448	1.00015e-276	2.94004e-274	-0.810563	0.106024	-7.64507	2.08836e-14	1.05021e-13	-2.0862	0.0843111	-24.7441	3.58803e-135	8.59328e-134	326.387	378.47	352.733	224.153	202.242	176.931	3159.05	2939.7	2905.51	750.023	657.833	711.774
ENSG00000173821	RNF213	13065.4	3.07386	0.0477699	64.3473	0	0	-2.02747	0.0539661	-37.5693	0	0	-3.21924	0.0484793	-66.4045	0	0	4863.75	4923.29	5045.97	1179.87	1204.15	1254	41638.1	41863.2	41395.9	4111.28	4323.07	4982.42
ENSG00000198933	TBKBP1	226.453	3.07177	0.176067	17.4466	3.65531e-68	2.6266e-66	1.3427	0.187117	7.17574	7.19195e-13	3.39184e-12	-1.27557	0.159366	-8.00406	1.20385e-15	5.95307e-15	44.3953	61.0948	70.711	144.975	168.535	133.804	481.087	517.566	483.231	203.847	212.512	195.677
ENSG00000204592	HLA-E	11170.2	3.07086	0.0369334	83.1459	0	0	1.7573	0.0378903	46.3786	0	0	-0.188386	0.0340532	-5.53212	3.16392e-08	1.09578e-07	2243.61	2231.94	2173.95	7361.38	7589.9	7529.53	19054.2	18931.7	17890	16086.2	16869.7	16081
ENSG00000185499	MUC1	348.028	3.03862	0.138757	21.8989	2.66175e-106	3.17099e-104	-0.363839	0.1656	-2.1971	0.0280132	0.052918	-1.8996	0.132496	-14.337	1.28439e-46	1.24153e-45	115.099	99.1799	128.266	93.6761	87.1734	85.1482	898.204	971.884	942.825	218.249	261.462	275.17
ENSG00000005059	MCUB	232.22	3.02984	0.171499	17.6668	7.55519e-70	5.53436e-68	-0.580861	0.208438	-2.78673	0.00532423	0.0116646	-1.97916	0.165009	-11.9943	3.80781e-33	2.95459e-32	81.3913	71.4095	81.3999	55.7596	43.0055	57.5027	664.233	677.914	569.897	190.552	148.042	145.535
ENSG00000167772	ANGPTL4	1222.63	3.02011	0.0833271	36.2441	1.23214e-287	3.9842e-285	-2.17498	0.118092	-18.4177	9.47816e-76	1.50182e-74	-3.82521	0.0931881	-41.0483	0	0	531.099	491.932	457.977	127.132	101.121	99.5239	4187.82	4065.7	3760.8	260.348	309.217	278.839
ENSG00000129667	RHBDF2	1431.5	3.0091	0.0859525	35.0089	1.64816e-268	4.66326e-266	-2.71078	0.127374	-21.282	1.66606e-100	3.38224e-99	-3.28668	0.0901668	-36.4512	6.59502e-291	3.9025e-289	551.652	532.398	628.999	97.0216	92.9849	71.8784	4659.27	4471.02	4658.1	429.851	436.963	547.895

## Sheet: RNAseq_DUX4-F67A
DUX4F67A_geneID	DUX4F67A_geneName	DUX4F67A_baseMean	DUX4F67A_log2FoldChange_IFNg_vs_untreated	DUX4F67A_lfcSE_IFNg_vs_untreated	DUX4F67A_stat_IFNg_vs_untreated	DUX4F67A_pvalue_IFNg_vs_untreated	DUX4F67A_padj_IFNg_vs_untreated	DUX4F67A_log2FoldChange_doxIFNg_vs_IFNg	DUX4F67A_lfcSE_doxIFNg_vs_IFNg	DUX4F67A_stat_doxIFNg_vs_IFNg	DUX4F67A_pvalue_doxIFNg_vs_IFNg	DUX4F67A_padj_doxIFNg_vs_IFNg	DUX4F67A_untreated_1	DUX4F67A_untreated_2	DUX4F67A_untreated_3	DUX4F67A_IFNg_1	DUX4F67A_IFNg_2	DUX4F67A_IFNg_3	DUX4F67A_doxIFNg_1	DUX4F67A_doxIFNg_2	DUX4F67A_doxIFNg_3
ENSG00000226025.9	LGALS17A	647.754	13.4545	1.18334	11.37	5.9e-30	2.27e-28	-8.53885	0.36754	-23.2324	2.14e-119	5.87e-117	0	0	0	2028.97	1859.91	1925.09	6.84175	0.886159	8.09021
ENSG00000134321.12	RSAD2	596.299	12.0346	1.18647	10.1432	3.55e-24	1.06e-22	-1.90032	0.147755	-12.8613	7.43e-38	3.76e-36	0	0.892208	0	1381.04	1503.31	1348.3	317.653	362.439	453.052
ENSG00000138755.6	CXCL9	4083.57	11.6524	0.898367	12.9706	1.8e-38	9.14e-37	-10.2741	0.836866	-12.2769	1.21e-34	5.41e-33	0	0.892208	10.5901	13776.8	11687.4	11246.8	12.7061	6.20311	10.787
ENSG00000169245.6	CXCL10	1611.37	11.5755	0.663388	17.449	3.5e-68	3.32e-66	-6.35903	0.1873	-33.951	1.18e-252	1.66e-249	0	0	4.81367	5523.12	4817.58	3982.44	53.7566	49.6249	71.0141
ENSG00000169248.13	CXCL11	1563.51	11.5319	0.671593	17.1709	4.38e-66	3.96e-64	-6.39215	0.21625	-29.5591	5.02e-192	3.32e-189	0.962857	0	3.85093	6053.24	4082.24	3765.68	55.7114	47.8526	62.025
ENSG00000100336.17	APOL4	1157.76	11.1139	0.653553	17.0054	7.49e-65	6.68e-63	-9.37885	0.36535	-25.6709	2.47e-145	9.11e-143	0.962857	0	3.85093	3280.63	3607.94	3510.96	3.90957	7.08927	4.49456
ENSG00000204287.14	HLA-DRA	124.575	11.0781	1.18987	9.31035	1.27e-20	3.17e-19	-10.1454	1.18987	-8.52646	1.51e-17	2.83e-16	0	0	0	344.998	409.04	366.159	0.977393	0	0
ENSG00000019582.15	CD74	4642.85	10.9735	0.497819	22.0432	1.11e-107	1.62e-105	-10.4765	0.468054	-22.3831	5.75e-111	1.44e-108	2.88857	3.56883	14.441	11559.5	14732.4	15443.6	6.84175	8.86159	13.4837
ENSG00000198502.6	HLA-DRB5	108.091	10.8738	1.19604	9.09149	9.77e-20	2.33e-18	-10.9028	1.19604	-9.11579	7.81e-20	1.72e-18	0	0	0	259.8	355.434	357.587	0	0	0
ENSG00000134326.11	CMPK2	709.518	10.8563	0.839927	12.9253	3.24e-38	1.64e-36	-2.16312	0.116105	-18.6308	1.81e-77	2.53e-75	0	0	2.8882	1732.35	1845.93	1639.76	365.545	370.414	428.781
ENSG00000131203.13	IDO1	3987.18	10.8021	0.988172	10.9314	8.16e-28	2.88e-26	-10.0032	0.966423	-10.3508	4.15e-25	1.21e-23	0.962857	0.892208	18.2919	12417.8	12194.3	11217.4	11.7287	13.2924	9.88804
ENSG00000154451.14	GBP5	7885.14	10.7991	0.245114	44.0575	0	0	-6.76942	0.116403	-58.155	0	0	7.70286	7.13766	25.0311	22843.5	24562.2	22877	196.456	217.995	229.223
ENSG00000136514.3	RTP4	211.552	10.5113	1.1841	8.87703	6.87e-19	1.58e-17	-1.77374	0.137723	-12.879	5.91e-38	3.01e-36	0.962857	0	0	479.631	508.096	484.946	134.88	145.33	150.118
ENSG00000196126.11	HLA-DRB1	274.378	10.3593	1.03368	10.0218	1.22e-23	3.56e-22	-11.2839	1.18984	-9.4835	2.46e-21	5.86e-20	0	0	1.92547	678.426	912.474	875.597	0.977393	0	0
ENSG00000162654.9	GBP4	8824.45	10.3215	0.425738	24.2438	7.68e-130	1.3e-127	-4.09307	0.38514	-10.6275	2.22e-26	6.76e-25	9.62857	11.5987	37.5466	27456.8	24268.6	23243.1	1371.28	1418.74	1602.76
ENSG00000121858.11	TNFSF10	627.564	10.0982	0.669555	15.082	2.13e-51	1.48e-49	-3.35735	0.18975	-17.6935	4.7e-70	5.68e-68	0.962857	0.892208	2.8882	2159.39	1654.81	1327.48	153.451	164.826	183.378
ENSG00000141574.8	SECTM1	4412.29	8.63044	0.208225	41.4477	0	0	-4.49049	0.155184	-28.9365	4.15e-184	2.59e-181	27.9229	31.2273	36.5839	10235.3	13505.3	14187.1	545.385	489.16	652.611
ENSG00000010030.14	ETV7	710.13	8.47213	0.390553	21.6926	2.41e-104	3.41e-102	-1.8544	0.122868	-15.0926	1.81e-51	1.45e-49	5.77714	6.24545	1.92547	1507.26	1762.02	1726.7	451.556	422.698	506.987
ENSG00000180616.9	SSTR2	144.377	8.31574	0.735251	11.3101	1.17e-29	4.43e-28	-3.57545	0.197647	-18.09	3.82e-73	4.9e-71	0	2.67662	0.962734	382.863	397.387	415.143	35.1862	31.0156	34.1587
ENSG00000183486.13	MX2	1604.84	8.27066	0.270197	30.6097	9.09e-206	3.06e-203	-0.848812	0.0911907	-9.30809	1.3e-20	3e-19	9.62857	11.5987	8.6646	3061.86	3181.42	3024.79	1643	1658	1844.57
ENSG00000100342.21	APOL1	5940.81	8.20619	0.147398	55.6735	0	0	-2.35125	0.0949026	-24.7754	1.65e-135	5.54e-133	51.0314	54.4247	45.2485	13555.9	15994.5	15029.7	2950.75	2782.54	3003.27
ENSG00000135114.12	OASL	2773.51	8.04599	0.195975	41.0561	0	0	-1.34197	0.0988248	-13.5793	5.31e-42	3.09e-40	26.96	22.3052	18.2919	5467.37	6397.81	5987.13	2313.49	2249.07	2479.2
ENSG00000157601.14	MX1	14033.4	7.99526	0.177878	44.9481	0	0	-0.507444	0.157914	-3.21341	0.00131168	0.00520322	116.506	114.203	58.7267	22104	26520	25349.5	16966.6	16817.5	18253.3
ENSG00000168062.10	BATF2	1162.34	7.91116	0.266045	29.7361	2.62e-194	8.31e-192	-2.22008	0.130549	-17.0057	7.46e-65	8.3e-63	11.5543	11.5987	12.5155	2414.99	2940.2	3228.08	647.034	594.613	600.474
ENSG00000134470.21	IL15RA	635.435	7.79555	0.32606	23.9083	2.51e-126	4.1e-124	-2.39984	0.133531	-17.9721	3.22e-72	4.05e-70	4.81428	10.7065	5.7764	1371.58	1666.46	1752.42	291.263	302.18	313.721
ENSG00000158714.11	SLAMF8	185.313	7.72955	0.537156	14.3898	6e-47	3.77e-45	-4.58562	0.23913	-19.1762	5.85e-82	8.76e-80	2.88857	2.67662	1.92547	444.921	576.852	571.894	27.367	17.7232	21.5739
ENSG00000179583.19	CIITA	1827.02	7.54991	0.204434	36.9307	1.49e-298	7.51e-296	-4.52166	0.145781	-31.0169	3.19e-211	2.48e-208	29.8486	20.5208	33.6957	4637.49	5328.01	5711.59	202.32	210.02	269.674
ENSG00000102524.11	TNFSF13B	723.191	7.52832	0.28314	26.5887	9.16e-156	2.14e-153	-4.72224	0.174621	-27.0427	4.65e-161	2.18e-158	11.5543	8.92208	13.4783	2372.91	2110.46	1754.87	80.1462	64.6896	91.6891
ENSG00000090339.9	ICAM1	3727.06	7.14861	0.171085	41.7839	0	0	-2.10878	0.139056	-15.1649	6.04e-52	4.86e-50	85.6943	53.5324	51.9876	7607.83	9660.81	9806.69	2137.56	2066.52	2072.89
ENSG00000119922.10	IFIT2	7037.41	7.13342	0.122533	58.2161	0	0	-2.41409	0.100165	-24.1012	2.43e-128	7.69e-126	138.651	113.31	126.118	17682.2	18948.7	16381.6	3161.87	3175.11	3609.13
ENSG00000133321.11	PLAAT4	2645.4	6.80974	0.147425	46.1912	0	0	-2.85373	0.108818	-26.2247	1.39e-151	5.89e-149	65.4743	55.3169	64.5031	6086.9	7464.11	7201.94	920.705	944.645	1004.98
ENSG00000137496.18	IL18BP	3307.47	6.70702	0.15512	43.2377	0	0	-3.46731	0.131537	-26.36	3.95e-153	1.71e-150	75.1028	83.8675	100.124	7566.81	9847.26	9647.49	804.395	759.438	882.732
ENSG00000089127.14	OAS1	4387.65	6.67691	0.188481	35.4248	7.1e-275	3.35e-272	-0.659888	0.16533	-3.99133	6.57e-05	0.000336838	114.58	69.5922	51.0249	7442.7	8664.43	7931.81	5100.04	4864.13	5250.55
ENSG00000163131.11	CTSS	5018.08	6.65485	0.109813	60.6019	0	0	-2.66867	0.0853607	-31.2634	1.47e-214	1.18e-211	114.58	117.771	152.112	12838.5	13262.9	12591.5	2018.32	1975.25	2091.77
ENSG00000185885.16	IFITM1	3345.19	6.64477	0.188463	35.2577	2.61e-272	1.21e-269	-1.8468	0.165675	-11.1471	7.39e-29	2.52e-27	103.989	77.6221	51.9876	6527.61	8663.26	8184.08	2160.04	2000.95	2337.17
ENSG00000130303.13	BST2	4005.86	6.62866	0.166845	39.7294	0	0	-2.23626	0.146928	-15.2201	2.6e-52	2.12e-50	123.246	104.388	70.2795	8365.15	10441.6	10688.4	2095.53	1971.7	2192.45
ENSG00000137959.16	IFI44L	3246.08	6.49002	0.182665	35.5296	1.72e-276	8.28e-274	-0.98336	0.156348	-6.28954	3.18e-10	3.25e-09	81.8428	62.4545	70.2795	8079.05	5928.17	5251.14	3079.77	3233.59	3428.45
ENSG00000025708.14	TYMP	207.23	6.40361	0.391273	16.3661	3.34e-60	2.71e-58	-1.78171	0.205265	-8.68006	3.96e-18	7.81e-17	4.81428	4.46104	7.70187	347.101	505.765	579.241	133.903	137.355	144.725
ENSG00000172183.15	ISG20	866.982	6.33502	0.212635	29.7929	4.83e-195	1.55e-192	-1.40474	0.134248	-10.4638	1.27e-25	3.75e-24	29.8486	17.8441	22.1429	1629.27	1915.85	2068.37	695.904	643.351	780.256
ENSG00000183153.7	GJD3	159.082	6.26262	0.363566	17.2255	1.71e-66	1.57e-64	-4.9881	0.259015	-19.2579	1.21e-82	1.85e-80	3.85143	2.67662	11.5528	441.765	446.332	482.497	12.7061	14.1785	16.1804
ENSG00000137752.24	CASP1	287.542	6.25894	0.295952	21.1485	2.85e-99	3.76e-97	-1.86947	0.129314	-14.4568	2.27e-47	1.59e-45	11.5543	8.92208	5.7764	668.959	696.883	645.37	179.84	171.915	198.66
ENSG00000197142.10	ACSL5	251.694	6.25148	0.29719	21.0353	3.12e-98	4.08e-96	-3.07618	0.148526	-20.7114	2.74e-95	5.12e-93	8.66571	8.02987	9.62734	665.804	684.064	651.493	85.0332	82.4128	70.1152
ENSG00000111335.13	OAS2	10310.4	6.24953	0.154662	40.4076	0	0	-0.568802	0.145836	-3.90029	9.61e-05	0.000476746	312.928	232.866	177.143	17917.8	19137.5	17939.3	11979.9	12358.4	12737.6
ENSG00000115267.8	IFIH1	1943.02	6.245	0.16674	37.4536	5.24e-307	2.71e-304	-1.91816	0.13231	-14.4975	1.26e-47	8.94e-46	74.14	49.9636	56.8013	5215.99	4530.91	3938.35	1121.07	1240.62	1259.38
ENSG00000225492.6	GBP1P1	1750.25	6.2381	0.13003	47.9745	0	0	-3.18148	0.0873639	-36.4164	2.34e-290	4.05e-287	66.4371	61.5623	57.764	4516.53	4853.71	4651.08	509.222	531.695	504.29
ENSG00000128284.19	APOL3	1964.72	6.0831	0.144594	42.0703	0	0	-2.48463	0.112659	-22.0544	8.67e-108	1.97e-105	82.8057	74.0532	61.6149	4415.55	5213.81	5187.45	895.292	814.38	937.566
ENSG00000140511.12	HAPLN3	1556.13	6.0642	0.183331	33.078	6.17e-240	2.42e-237	-1.42633	0.145508	-9.80237	1.1e-22	2.84e-21	42.3657	54.4247	53.9131	2752.62	3442.46	3902.84	1254.97	1130.74	1370.84
ENSG00000162645.13	GBP2	8600.51	6.04829	0.0926477	65.2827	0	0	-3.52711	0.0840069	-41.986	0	0	378.403	324.764	359.1	21929.4	24087.9	24231.4	2039.82	1961.07	2092.67
ENSG00000117228.10	GBP1	21756.4	5.99006	0.0704873	84.9808	0	0	-2.84995	0.0657081	-43.3729	0	0	915.677	877.932	875.125	54545.4	58160.6	56907.7	7660.81	7745.03	8118.98
ENSG00000184979.10	USP18	1255.07	5.92924	0.172976	34.2778	1.68e-257	7.27e-255	-0.571504	0.112007	-5.1024	3.35e-07	2.45e-06	39.4771	38.3649	31.7702	1997.41	2314.4	2375.75	1407.45	1458.62	1632.42
ENSG00000119917.14	IFIT3	11197.1	5.91998	0.0904192	65.4726	0	0	-1.32441	0.0811222	-16.3262	6.43e-60	6.42e-58	421.731	388.11	365.839	23849	24724.2	22603.9	8954.88	9722.05	9744.21
ENSG00000133106.14	EPSTI1	2272.83	5.877	0.147974	39.7165	0	0	-1.30279	0.119339	-10.9167	9.59e-28	3.12e-26	103.026	84.7597	56.8013	4804.73	4999.38	4577.6	1825.77	1961.96	2041.43
ENSG00000185745.10	IFIT1	8459.49	5.80453	0.116019	50.0308	0	0	-0.785679	0.106007	-7.41161	1.25e-13	1.75e-12	337	271.231	244.534	15862.5	16760.2	15022.3	8794.58	9240.86	9602.18
ENSG00000185338.6	SOCS1	109.047	5.78408	0.415435	13.923	4.59e-44	2.67e-42	-3.33675	0.268451	-12.4296	1.8e-35	8.4e-34	6.74	6.24545	2.8882	228.245	302.993	347.79	19.5479	31.0156	35.9565
ENSG00000108387.15	SEPTIN4	120.868	5.7601	0.372736	15.4536	7.14e-54	5.19e-52	-4.30383	0.268376	-16.0365	7.1e-58	6.82e-56	7.70285	6.24545	4.81367	289.251	368.253	360.036	18.5705	22.154	10.7869
ENSG00000131979.20	GCH1	183.186	5.75108	0.307623	18.6952	5.42e-78	5.83e-76	-3.84093	0.208204	-18.4479	5.42e-76	7.48e-74	9.62857	8.92208	9.62734	591.124	480.127	443.309	38.1183	34.5602	33.2598
ENSG00000164509.15	IL31RA	315.445	5.74713	0.230173	24.9687	1.34e-137	2.45e-135	-3.53588	0.144231	-24.5154	1.01e-132	3.35e-130	13.48	16.0597	18.2919	838.303	897.325	833.961	74.2819	70.8927	76.4076
ENSG00000165949.12	IFI27	720.193	5.72322	0.203026	28.1895	7.85e-175	2.17e-172	-0.747439	0.127728	-5.85181	4.86e-09	4.4e-08	31.7743	25.874	18.2919	1146.49	1431.06	1437.69	780.937	772.731	836.888
ENSG00000140105.18	WARS1	59282.2	5.66494	0.0718482	78.846	0	0	-3.00082	0.0705854	-42.5134	0	0	3029.15	3130.76	3026.83	145347	164696	156078	19215.5	19336	19679.9
ENSG00000125347.14	IRF1	6092.03	5.54207	0.107457	51.5749	0	0	-2.19547	0.0984197	-22.3072	3.15e-110	7.69e-108	340.851	320.303	287.857	13067.8	15651.9	15504.8	3218.56	3189.29	3246.87
ENSG00000187608.10	ISG15	7758.07	5.45917	0.198593	27.4892	2.36e-166	6.12e-164	-0.564972	0.193432	-2.92077	0.00349164	0.0125047	388.994	324.764	220.466	10336.3	14556.5	16211.4	9484.62	8650.68	9648.93
ENSG00000116663.11	FBXO6	513.354	5.44753	0.233093	23.3706	8.51e-121	1.34e-118	0.0370398	0.131712	0.281219	0.778543	0.879435	22.1457	13.3831	16.3665	652.13	764.474	838.859	822.965	723.992	765.873
ENSG00000244731.8	C4A	131.813	5.43489	0.371943	14.6121	2.35e-48	1.54e-46	-4.138	0.303455	-13.6363	2.44e-42	1.44e-40	14.4428	6.24545	4.81367	276.629	379.906	442.085	18.5705	29.2432	14.3826
ENSG00000168394.11	TAP1	537.899	5.38748	0.198505	27.1402	3.3e-162	8.15e-160	-1.53839	0.133647	-11.5108	1.16e-30	4.32e-29	28.8857	24.9818	30.8075	991.869	1235.28	1311.56	414.415	397.885	405.41
ENSG00000173193.15	PARP14	11839.4	5.33111	0.105354	50.602	0	0	-1.54503	0.100804	-15.3271	5.04e-53	4.19e-51	657.631	653.096	624.814	29569.9	25256.8	23090.1	8725.19	8973.24	9003.51
ENSG00000068079.8	IFI35	4181.81	5.32496	0.16911	31.488	1.27e-217	4.48e-215	-0.978731	0.159882	-6.12158	9.27e-10	9.01e-09	251.306	216.806	144.41	6952.55	8670.25	8938.44	4256.55	4011.64	4194.33
ENSG00000138646.9	HERC5	787.983	5.1872	0.183179	28.3176	2.1e-176	6.01e-174	-0.964777	0.137551	-7.01397	2.32e-12	2.95e-11	38.5143	48.1792	39.4721	1799.67	1489.33	1316.46	727.181	831.217	801.83
ENSG00000149131.16	SERPING1	3457.16	4.87109	0.117218	41.5558	0	0	-3.14093	0.110698	-28.3739	4.25e-177	2.39e-174	337.963	298.889	289.783	7803.47	9833.28	9477.27	1046.79	1002.25	1024.76
ENSG00000137198.10	GMPR	485.103	4.80362	0.18174	26.4312	6e-154	1.35e-151	-0.892685	0.120997	-7.37774	1.61e-13	2.25e-12	30.8114	41.0415	26.9565	835.147	1010.36	928.256	492.606	482.07	518.673
ENSG00000002549.12	LAP3	9851.98	4.77975	0.0919283	51.9944	0	0	-2.47447	0.0886588	-27.91	2.02e-171	1.05e-168	943.6	899.345	810.622	22504.8	25658.8	24734.7	4198.88	4382.94	4534.11
ENSG00000107201.10	DDX58	6040.52	4.73087	0.132857	35.6088	1.02e-277	5.05e-275	-1.0491	0.12771	-8.21471	2.13e-16	3.7e-15	414.991	447.888	483.292	14037.6	11706	10000.2	5408.9	5924.86	5940.91
ENSG00000204642.14	HLA-F	241.854	4.69949	0.22997	20.4352	8.14e-93	1.03e-90	-1.40595	0.152164	-9.23975	2.47e-20	5.6e-19	22.1457	18.7364	18.2919	447.025	522.08	568.22	216.004	179.004	185.176
ENSG00000101347.10	SAMHD1	5425.09	4.6298	0.0930074	49.7788	0	0	-1.36811	0.0859083	-15.9252	4.24e-57	3.95e-55	502.611	418.445	461.149	11924.5	11597.6	10673.7	4311.28	4472.44	4464
ENSG00000164342.13	TLR3	855.098	4.43701	0.191421	23.1793	7.37e-119	1.13e-116	-0.82381	0.168802	-4.88034	1.06e-06	7.23e-06	62.5857	70.4844	87.6087	2035.28	1419.4	1321.36	853.264	906.541	939.364
ENSG00000128335.14	APOL2	7220	4.42081	0.0978127	45.1966	0	0	-1.15152	0.0932794	-12.3449	5.19e-35	2.38e-33	749.103	667.371	610.373	13302.4	15002.8	15106.8	6532.9	6429.08	6579.14
ENSG00000162772.17	ATF3	433.66	4.31948	0.16838	25.6532	3.9e-145	8.03e-143	-2.39084	0.138369	-17.2788	6.8e-67	7.88e-65	60.66	54.4247	42.3603	964.521	1172.35	1009.08	195.479	217.995	186.075
ENSG00000151468.11	CCDC3	441.211	4.30594	0.177979	24.1935	2.6e-129	4.39e-127	-5.32687	0.20499	-25.986	7.13e-149	2.81e-146	79.9171	63.3467	43.323	1145.43	1236.44	1310.34	33.2314	31.9017	26.9674
ENSG00000110446.11	SLC15A3	2037.17	4.29706	0.122981	34.9408	1.79e-267	8.08e-265	-0.315603	0.107146	-2.94556	0.00322376	0.0116643	181.017	165.951	155.963	2853.59	3486.75	3547.7	2709.33	2572.52	2661.68
ENSG00000156587.16	UBE2L6	5495.3	4.25485	0.102013	41.7088	0	0	-0.802312	0.0963843	-8.32409	8.5e-17	1.51e-15	544.014	553.169	495.808	8938.39	10890.3	10592.9	5792.03	5912.45	5738.66
ENSG00000111331.13	OAS3	10054	4.24338	0.138707	30.5924	1.54e-205	5.12e-203	-1.09244	0.136696	-7.99177	1.33e-15	2.18e-14	1259.42	1051.02	828.913	18058.7	21153.6	20249	9224.64	9069.84	9590.5
ENSG00000132530.17	XAF1	1525.15	4.24041	0.105695	40.1193	0	0	-0.590265	0.0831497	-7.09882	1.26e-12	1.64e-11	143.466	143.645	135.745	2794.69	2596.41	2602.3	1731.94	1717.38	1860.75
ENSG00000126709.15	IFI6	9905.87	4.22596	0.17635	23.9636	6.67e-127	1.1e-124	0.18735	0.1739	1.07735	0.281326	0.460043	950.34	713.766	509.286	12600.8	13921.4	14147.9	15463.3	14689.9	16156.2
ENSG00000182326.15	C1S	2439.14	4.18571	0.0951983	43.9684	0	0	-2.90299	0.0889555	-32.6342	1.34e-233	1.59e-230	355.294	342.608	316.739	5747.16	6332.55	6388.8	831.762	781.592	855.765
ENSG00000059378.13	PARP12	2081.36	4.15028	0.10855	38.2339	0	0	-0.489835	0.0936028	-5.23312	1.67e-07	1.27e-06	224.346	180.226	192.547	3278.53	3660.39	3654.24	2439.57	2487.45	2614.94
ENSG00000177409.12	SAMD9L	7598.53	4.14719	0.160318	25.8685	1.51e-147	3.14e-145	-1.20182	0.158249	-7.59444	3.09e-14	4.57e-13	765.471	858.304	964.659	19385.1	14123	12352.7	6226.97	6838.49	6872.19
ENSG00000197536.11	NA	240.752	4.14645	0.194703	21.2963	1.23e-100	1.65e-98	-1.35306	0.134422	-10.0657	7.83e-24	2.14e-22	25.9971	23.1974	35.6211	534.326	477.796	483.722	203.298	195.841	186.974
ENSG00000138642.15	HERC6	1840.03	4.14221	0.150662	27.4935	2.1e-166	5.51e-164	-0.420944	0.138638	-3.03628	0.00239518	0.00895455	215.68	166.843	137.671	3401.59	3090.53	2689.25	2192.29	2298.7	2367.74
ENSG00000164171.11	ITGA2	280.6	4.0936	0.199847	20.4837	3.01e-93	3.83e-91	-2.67183	0.172528	-15.4863	4.29e-54	3.7e-52	33.7	46.3948	41.3975	822.525	611.812	642.921	123.152	101.022	102.476
ENSG00000130589.16	HELZ2	6790.96	4.07952	0.196176	20.7952	4.79e-96	6.2e-94	0.291493	0.193156	1.50911	0.131271	0.262216	639.337	567.444	376.429	6809.5	9234.29	10727.6	11395.4	10015.4	11353.3
ENSG00000137965.11	IFI44	3239.07	4.00717	0.134993	29.6842	1.23e-193	3.83e-191	-0.123535	0.127399	-0.969665	0.332213	0.515948	323.52	303.351	288.82	5874.43	4674.25	4172.25	4316.17	4666.51	4532.32
ENSG00000221963.6	APOL6	6739.9	4.00152	0.10053	39.8042	0	0	-0.794475	0.0966966	-8.21616	2.1e-16	3.66e-15	729.846	750.347	830.839	13712.6	12126.7	11169.7	7009.86	7147.76	7181.41
ENSG00000261971.8	NA	248.929	3.99778	0.215762	18.5287	1.21e-76	1.29e-74	-1.77612	0.177871	-9.98542	1.77e-23	4.76e-22	41.4029	26.7662	35.6211	458.595	607.151	587.814	184.727	135.582	162.703
ENSG00000159403.18	C1R	1036.37	3.99161	0.140983	28.3126	2.41e-176	6.83e-174	-3.25055	0.135154	-24.0507	8.21e-128	2.56e-125	192.571	165.951	143.447	2375.01	2828.32	2782.32	314.721	249.011	275.966
ENSG00000138496.16	PARP9	3080.96	3.99036	0.101273	39.402	0	0	-0.878304	0.0930621	-9.43783	3.81e-21	8.98e-20	402.474	371.158	311.926	5930.18	5797.65	5527.9	3024.05	3132.57	3230.69
ENSG00000135899.18	SP110	2819.92	3.98238	0.12306	32.3611	9.67e-230	3.6e-227	-0.191944	0.113805	-1.68661	0.0916791	0.198359	324.483	277.477	226.242	4102.11	4584.51	4404.93	3618.31	3872.51	3968.7
ENSG00000239713.9	APOBEC3G	711.417	3.94453	0.141697	27.8379	1.51e-170	4.11e-168	-1.06944	0.117491	-9.10228	8.85e-20	1.95e-18	98.2114	100.82	70.2795	1311.62	1414.74	1427.9	654.854	608.791	715.534
ENSG00000123685.9	BATF3	114.919	3.93336	0.293492	13.4019	5.89e-41	3.23e-39	-1.37918	0.226451	-6.09039	1.13e-09	1.09e-08	13.48	24.0896	8.6646	194.587	235.402	284.11	81.1236	93.9328	98.8804
ENSG00000116194.13	ANGPTL1	362.977	3.93238	0.197051	19.9562	1.32e-88	1.61e-86	0.24665	0.139222	1.77164	0.0764545	0.171424	26.96	20.5208	48.1367	474.372	504.599	471.476	562.001	560.052	598.676
ENSG00000112139.16	MDGA1	585.594	3.82936	0.180675	21.1947	1.07e-99	1.43e-97	-3.51334	0.177047	-19.8442	1.24e-87	2.12e-85	137.689	85.6519	97.2361	1314.78	1577.89	1658.12	155.405	127.607	115.96
ENSG00000173821.19	RNF213	19118.1	3.81333	0.0816452	46.7062	0	0	-1.05685	0.0803371	-13.1552	1.59e-39	8.63e-38	2708.52	2604.35	2574.35	36757	36044.5	38076.8	18045.6	16247.7	19003.9
ENSG00000204267.16	TAP2	221.208	3.77395	0.185374	20.3586	3.9e-92	4.89e-90	-1.56436	0.139462	-11.2171	3.36e-29	1.17e-27	33.7	33.9039	35.6211	498.564	485.954	426.165	147.586	161.281	168.097
ENSG00000115415.20	STAT1	21075.2	3.76456	0.0884931	42.5407	0	0	-1.38926	0.087554	-15.8675	1.06e-56	9.81e-55	3190.91	3130.76	3268.48	47586.6	43105.4	39639.5	15736	16970.8	17048.8
ENSG00000058866.15	DGKG	266.554	3.74892	0.19127	19.6001	1.54e-85	1.81e-83	-0.51232	0.138428	-3.70099	0.000214759	0.000997888	35.6257	30.3351	34.6584	386.019	489.45	476.374	304.947	329.651	311.923
ENSG00000130775.16	THEMIS2	820.436	3.7417	0.147604	25.3496	9.07e-142	1.73e-139	-0.213006	0.124541	-1.71033	0.0872047	0.190291	95.3228	103.496	85.6833	1060.24	1391.44	1360.54	1099.57	1083.77	1103.86
ENSG00000170581.14	STAT2	9861.51	3.70443	0.0810203	45.7223	0	0	-0.973484	0.0785887	-12.3871	3.07e-35	1.41e-33	1545.38	1428.42	1318.94	17911.5	18903.2	19146.8	9566.73	9266.56	9666.01
ENSG00000070759.17	TESK2	157.818	3.68448	0.25152	14.6488	1.37e-48	9.01e-47	-0.740052	0.19331	-3.82832	0.000129022	0.000625224	26.96	16.0597	23.1056	236.66	327.465	282.885	196.456	142.672	168.097
ENSG00000205220.12	PSMB10	735.309	3.66213	0.161919	22.617	2.95e-113	4.4e-111	-1.83546	0.150136	-12.2253	2.28e-34	1.01e-32	133.837	147.214	103.013	1370.53	1626.84	1872.43	438.85	430.673	494.402
ENSG00000206190.12	ATP10A	1134.78	3.62579	0.12249	29.6008	1.46e-192	4.49e-190	-1.37247	0.110682	-12.4001	2.61e-35	1.21e-33	194.497	188.256	180.994	2058.42	2392.48	2510.45	889.428	828.559	969.927
ENSG00000108771.13	DHX58	971.727	3.62481	0.14791	24.5069	1.25e-132	2.19e-130	-0.602336	0.132889	-4.53261	5.83e-06	3.53e-05	169.463	111.526	127.081	1476.76	1731.72	1818.55	1130.84	1080.23	1099.37
ENSG00000157873.17	TNFRSF14	749.756	3.61205	0.185765	19.4442	3.26e-84	3.78e-82	-1.71074	0.175738	-9.73457	2.15e-22	5.46e-21	163.686	117.771	116.491	1274.81	1664.13	1925.09	535.612	432.446	517.774
ENSG00000163840.10	DTX3L	3740.64	3.58724	0.0921752	38.9176	0	0	-1.0529	0.0871155	-12.0863	1.25e-33	5.35e-32	575.788	612.947	600.746	7764.55	7199.57	6544.33	3354.41	3551.72	3461.71
ENSG00000185507.21	IRF7	952.514	3.57978	0.220628	16.2254	3.33e-59	2.66e-57	0.483424	0.205688	2.35027	0.0187597	0.0537906	115.543	113.31	59.6895	870.909	1246.93	1337.28	1715.33	1449.76	1663.89
ENSG00000144857.14	BOC	292.224	3.56201	0.197222	18.061	6.47e-73	6.42e-71	-2.22036	0.178617	-12.4308	1.78e-35	8.29e-34	62.5857	65.1312	43.323	544.844	707.372	772.73	134.88	138.241	160.905
ENSG00000137628.17	DDX60	2421.64	3.54594	0.161186	21.999	2.94e-107	4.25e-105	-1.0965	0.156991	-6.98449	2.86e-12	3.62e-11	365.886	389.002	446.708	5916.5	4333.96	3780.38	2057.41	2280.09	2224.81
ENSG00000168404.13	MLKL	1780.2	3.52279	0.101523	34.6993	8.07e-264	3.57e-261	-0.912721	0.0916667	-9.95696	2.35e-23	6.27e-22	283.08	282.83	295.559	3039.77	3555.5	3306.45	1713.37	1692.56	1852.66
ENSG00000137767.14	SQOR	711.24	3.52219	0.129608	27.1758	1.26e-162	3.14e-160	-1.3865	0.113111	-12.2578	1.53e-34	6.83e-33	135.763	124.017	119.379	1328.45	1525.45	1502.6	527.792	521.948	615.755
ENSG00000182179.13	UBA7	2726.16	3.50472	0.134625	26.0332	2.09e-149	4.48e-147	-0.135654	0.128407	-1.05643	0.29077	0.470455	424.62	316.734	340.808	3539.38	4360.76	4377.99	3885.14	3448.04	3841.95
ENSG00000184371.14	CSF1	8244.09	3.47279	0.122858	28.2668	8.85e-176	2.47e-173	-2.54262	0.122126	-20.8196	2.87e-96	5.52e-94	1967.12	1773.71	1555.78	16892.3	20228.3	21686.6	3475.61	3146.75	3470.7
ENSG00000204264.12	PSMB8	232.494	3.46616	0.19895	17.4223	5.59e-68	5.28e-66	-0.335457	0.149392	-2.24548	0.0247372	0.0677089	42.3657	29.4428	28.882	317.65	400.883	393.1	297.128	277.368	305.63
ENSG00000146859.6	TMEM140	1211.55	3.463	0.142034	24.3816	2.68e-131	4.63e-129	-0.741949	0.131652	-5.63571	1.74e-08	1.49e-07	233.974	192.717	158.851	1872.24	2274.78	2310.84	1306.78	1251.26	1302.52
ENSG00000140853.15	NLRC5	2449.83	3.40003	0.125045	27.1904	8.42e-163	2.13e-160	-1.54545	0.121061	-12.7659	2.54e-37	1.25e-35	521.869	527.295	403.385	4703.75	5015.69	5620.97	1853.14	1626.99	1775.35
ENSG00000168334.9	XIRP1	599.037	3.39056	0.179751	18.8626	2.32e-79	2.54e-77	-6.64166	0.259416	-25.6023	1.44e-144	5.21e-142	162.723	175.765	126.118	1426.27	1511.47	1939.78	22.48	16.837	9.88804
ENSG00000123609.11	NMI	964.362	3.38712	0.183218	18.4868	2.64e-76	2.73e-74	-0.517348	0.172944	-2.99142	0.00277685	0.0102334	119.394	154.352	188.696	2010.03	1492.82	1333.6	1161.14	1137.83	1081.39
ENSG00000111801.16	BTN3A3	1370.93	3.38573	0.122296	27.6848	1.06e-168	2.86e-166	-2.10689	0.116816	-18.036	1.02e-72	1.3e-70	335.074	254.279	300.373	2924.07	3411	2956.21	759.435	680.57	717.332
ENSG00000181381.13	DDX60L	4520.24	3.34416	0.211464	15.8143	2.48e-56	1.9e-54	-0.951597	0.209943	-4.53264	5.82e-06	3.53e-05	679.777	756.592	1043.6	11564.8	7323.1	6293.28	4239.93	4397.12	4384
ENSG00000185215.11	TNFAIP2	5048.71	3.31281	0.120144	27.5736	2.31e-167	6.13e-165	-3.06372	0.119764	-25.5814	2.46e-144	8.77e-142	1301.78	1255.34	1189.94	10480.4	12949.4	13807.5	1622.47	1375.32	1456.24
ENSG00000132274.16	TRIM22	7715	3.24906	0.0646726	50.2387	0	0	-1.61529	0.0626136	-25.7978	9.39e-147	3.52e-144	1733.14	1651.48	1717.52	16354.8	16463	15683.6	5308.22	5145.93	5377.3
ENSG00000151572.18	ANO4	226.271	3.24624	0.167198	19.4155	5.7e-84	6.54e-82	-2.29783	0.148657	-15.4572	6.74e-54	5.76e-52	53.92	56.2091	53.9131	560.621	533.733	461.679	97.7393	111.656	106.971
ENSG00000175084.12	DES	32146.1	3.2278	0.132369	24.3849	2.48e-131	4.31e-129	-5.44822	0.13333	-40.8628	0	0	10043.6	9228.1	8065.78	69771.6	91157.7	95181.7	2076.96	1896.38	1893.11
ENSG00000186088.16	GSAP	592.836	3.1831	0.19593	16.2461	2.38e-59	1.91e-57	-2.3537	0.190897	-12.3297	6.27e-35	2.85e-33	115.543	139.184	195.435	1656.62	1286.55	1142.56	270.738	289.774	239.111
ENSG00000008517.18	IL32	7499.9	3.17359	0.122386	25.931	2.98e-148	6.32e-146	-2.13567	0.121637	-17.5577	5.19e-69	6.21e-67	2041.26	1859.36	1688.63	14170.1	18453.4	17809.5	4087.46	3734.27	3654.98
ENSG00000205413.8	SAMD9	4495.12	3.15581	0.223379	14.1276	2.57e-45	1.54e-43	-0.755581	0.222037	-3.40295	0.000666634	0.00280478	725.994	848.489	1088.85	11232.4	6921.05	5580.56	4326.92	4982.87	4748.95
ENSG00000003400.15	CASP10	112.98	3.12722	0.234552	13.3327	1.49e-40	8.07e-39	-1.06591	0.185977	-5.73141	9.96e-09	8.73e-08	30.8114	24.9818	17.3292	239.816	207.433	191.039	103.604	93.9328	107.87
ENSG00000225131.2	PSME2P2	1025.88	3.12553	0.119372	26.183	4.15e-151	9.18e-149	-1.3847	0.110881	-12.4881	8.67e-36	4.1e-34	264.786	219.483	222.391	1833.33	2204.86	2127.15	824.92	764.755	771.267
ENSG00000041982.16	TNC	1272.92	3.10766	0.120081	25.8798	1.13e-147	2.37e-145	-1.40747	0.113517	-12.3987	2.66e-35	1.23e-33	329.297	299.782	260.901	2249.85	2690.81	2733.33	986.19	968.572	937.566
ENSG00000096968.14	JAK2	1084.06	3.10687	0.16986	18.2907	9.81e-75	9.87e-73	-2.51879	0.167565	-15.0317	4.55e-51	3.56e-49	251.306	269.447	357.174	3107.08	2343.53	2108.78	424.189	458.144	436.872
ENSG00000248988.1	PSME2P3	299.827	3.09952	0.179974	17.2221	1.81e-66	1.66e-64	-1.24325	0.159443	-7.79749	6.31e-15	9.85e-14	80.88	69.5922	53.9131	481.735	632.789	639.247	249.235	233.06	257.988
ENSG00000171860.5	C3AR1	116.347	3.09296	0.300301	10.2995	7.08e-25	2.21e-23	1.3903	0.182524	7.61706	2.6e-14	3.85e-13	12.5171	10.7065	9.62734	88.3531	102.551	89.3967	222.846	274.709	236.414
ENSG00000140464.20	PML	4923.06	3.08884	0.149277	20.6921	4.08e-95	5.22e-93	-1.42151	0.147975	-9.60644	7.51e-22	1.85e-20	1291.19	1246.41	955.032	8014.89	10689.8	11015.4	3909.57	3483.49	3701.72
ENSG00000187583.11	PLEKHN1	101.697	3.08237	0.319971	9.63328	5.79e-22	1.54e-20	1.30843	0.200928	6.51197	7.42e-11	8.06e-10	11.5543	9.81428	8.6646	66.2648	85.071	104.092	213.072	211.792	204.952
ENSG00000238000.1	PSME2P1	1447.65	3.06459	0.119861	25.5679	3.47e-144	7.01e-142	-1.34991	0.114175	-11.8232	2.96e-32	1.18e-30	369.737	359.56	300.373	2524.37	3117.33	2977.03	1099.57	1102.38	1178.47
ENSG00000117226.12	GBP3	8896.39	3.05699	0.0612501	49.9101	0	0	-0.831291	0.0590039	-14.0887	4.45e-45	2.97e-43	1948.82	1907.54	1862.89	15780.5	16147.2	15670.1	8695.87	9001.6	9052.95
ENSG00000026950.17	BTN3A1	1322	3.02615	0.0913573	33.1244	1.33e-240	5.31e-238	-0.763134	0.0807696	-9.44828	3.44e-21	8.16e-20	310.04	275.692	267.64	2255.11	2388.98	2305.94	1355.64	1377.98	1360.95
ENSG00000196116.8	TDRD7	1293.8	3.00342	0.0897495	33.4645	1.58e-245	6.59e-243	-0.144877	0.0754609	-1.9199	0.0548711	0.131182	244.566	240.004	231.056	1940.61	1949.64	1847.94	1702.62	1748.39	1739.4

## Sheet: RNAseq_DUX4-CTD
DUX4CTD_geneID	DUX4CTD_geneName	DUX4CTD_baseMean	DUX4CTD_log2FoldChange_IFNg_vs_untreated	DUX4CTD_lfcSE_IFNg_vs_untreated	DUX4CTD_stat_IFNg_vs_untreated	DUX4CTD_pvalue_IFNg_vs_untreated	DUX4CTD_padj_IFNg_vs_untreated	lDUX4CTD_og2FoldChange_doxIFNg_vs_IFNg	lDUX4CTD_fcSE_doxIFNg_vs_IFNg	DUX4CTD_stat_doxIFNg_vs_IFNg	DUX4CTD_pvalue_doxIFNg_vs_IFNg	DUX4CTD_padj_doxIFNg_vs_IFNg	DUX4CTD_untreated_1	DUX4CTD_untreated_2	DUX4CTD_untreated_3	DUX4CTD_IFNg_1	DUX4CTD_IFNg_2	DUX4CTD_IFNg_3	DUX4CTD_doxIFNg_1	DUX4CTD_doxIFNg_2	DUX4CTD_doxIFNg_3
ENSG00000131203.13	IDO1	3162.23	15.699	1.1846	13.2526	4.36e-40	2.91e-38	-10.5727	0.346089	-30.5491	5.8e-205	1.37e-201	0	0	0	10229.3	9178.33	9033.79	5.10944	2.63086	10.9623
ENSG00000154451.14	GBP5	5705.15	15.5654	1.18136	13.1758	1.21e-39	7.92e-38	-5.8941	0.101642	-57.9887	0	0	0.890038	0	0	16830.3	16780.7	16885.1	289.195	279.748	280.452
ENSG00000162654.9	GBP4	6426.33	14.7908	1.02831	14.3836	6.56e-47	5.51e-45	-4.19991	0.133762	-31.3984	2.13e-216	5.74e-213	0	0	2.05113	20994.7	16943.6	16912.7	913.569	999.728	1070.65
ENSG00000100336.17	APOL4	727.614	13.5796	1.18464	11.463	2.02e-30	9.82e-29	-11.1908	0.842469	-13.2833	2.89e-40	4.7e-38	0	0	0	2051.12	2256.16	2238.51	0	0	2.74057
ENSG00000226025.9	LGALS17A	467.62	12.9404	1.1846	10.9238	8.87e-28	3.76e-26	-9.54987	0.601892	-15.8664	1.08e-56	2.96e-54	0	0	0	1412.71	1409.67	1380.33	4.08756	0.876954	0.913524
ENSG00000138755.6	CXCL9	267.076	12.134	1.18781	10.2154	1.69e-24	6.15e-23	-11.2228	1.18781	-9.44836	3.44e-21	2.3e-19	0	0	0	883.867	763.905	755.031	0	0.876954	0
ENSG00000196126.11	HLA-DRB1	219.599	11.847	1.18895	9.96423	2.19e-23	7.41e-22	-8.23552	0.56869	-14.4816	1.58e-47	3.56e-45	0	0	0	581.519	679.027	709.304	2.04378	1.75391	2.74057
ENSG00000204287.14	HLA-DRA	205.261	11.7541	1.18843	9.89042	4.58e-23	1.53e-21	-10.843	1.18843	-9.12377	7.26e-20	4.43e-18	0	0	0	670.011	573.502	602.962	0	0.876954	0
ENSG00000019582.15	CD74	1739.59	11.6562	0.66356	17.5662	4.47e-69	6.34e-67	-8.73732	0.278077	-31.4205	1.06e-216	3.34e-213	0.890038	2.98958	1.02557	4446.72	5577.88	5589.36	19.4159	7.01564	10.9623
ENSG00000113263.13	ITK	152.338	10.3538	1.18935	8.7054	3.16e-18	8.22e-17	-7.51106	0.535841	-14.0173	1.22e-44	2.48e-42	0	0.996526	0	491.973	432.421	438.131	3.06567	2.63086	1.82705
ENSG00000111335.13	OAS2	1879.4	9.22821	0.314009	29.3883	7.74e-190	4.14e-187	-2.21025	0.110972	-19.9171	2.89e-88	1.48e-85	13.3506	5.97916	3.0767	4597.37	4729.1	4563.16	1090.36	980.435	931.795
ENSG00000089127.14	OAS1	526.801	9.11805	0.558741	16.3189	7.24e-60	8.56e-58	-1.94754	0.128851	-15.1147	1.3e-51	3.1e-49	3.56015	2.98958	0	1248.37	1313.32	1197.42	360.727	306.057	308.771
ENSG00000100342.21	APOL1	4859.88	8.89257	0.188572	47.1574	0	0	-3.1138	0.107372	-29.0001	6.56e-185	1.13e-181	20.4709	38.8645	23.588	12162.4	13496.8	13475.7	1551.23	1510.99	1458.9
ENSG00000090339.9	ICAM1	3716.63	8.70745	0.226702	38.4092	0	0	-3.68439	0.158113	-23.3022	4.21e-120	3.18e-117	33.8214	19.9305	19.4858	8830.24	11085.8	11051.1	899.262	832.23	677.835
ENSG00000179583.19	CIITA	2570.71	8.55111	0.240616	35.5384	1.26e-276	1.17e-273	-3.98395	0.156528	-25.4519	6.72e-143	7.93e-140	23.141	20.927	13.3324	6498.9	7683.78	7523.73	528.317	477.063	367.237
ENSG00000158714.11	SLAMF8	155.872	8.35482	0.751883	11.1119	1.1e-28	4.91e-27	-3.22633	0.241626	-13.3526	1.14e-40	1.94e-38	2.67011	0	1.02557	338.166	435.862	490.239	44.9631	56.1251	33.8004
ENSG00000010030.14	ETV7	386.438	8.23378	0.45721	18.0088	1.66e-72	2.52e-70	-3.6117	0.165311	-21.848	8.13e-106	5.29e-103	2.67011	3.9861	4.10227	964.984	1108.01	1131.48	100.145	88.5724	73.9955
ENSG00000163131.11	CTSS	3106.78	8.21193	0.182501	44.9967	0	0	-2.42166	0.0913115	-26.5208	5.58e-155	8.02e-152	30.2613	19.9305	28.7159	7950.59	7777.84	7768.32	1436.78	1431.19	1517.36
ENSG00000130303.13	BST2	2533.75	7.823	0.202631	38.607	0	0	-2.5593	0.134756	-18.9921	1.98e-80	8.91e-78	36.4916	24.9132	23.588	5633.99	6951.99	6836.76	1209.92	1060.24	1025.89
ENSG00000168062.10	BATF2	1019.61	7.75155	0.286	27.1034	8.99e-162	3.93e-159	-1.78774	0.146729	-12.184	3.78e-34	4.89e-32	9.79042	12.9548	10.2557	2033.21	2425.91	2630.91	713.278	743.657	596.531
ENSG00000141574.8	SECTM1	3227.14	7.65637	0.185722	41.2248	0	0	-4.86173	0.148214	-32.8021	5.5e-236	2.6e-232	60.5226	33.8819	43.0738	7974.82	10149.8	9820.73	332.114	309.565	319.734
ENSG00000133321.11	PLAAT4	2327.75	7.60555	0.199976	38.0323	0	0	-2.67558	0.137546	-19.4522	2.79e-84	1.39e-81	37.3816	24.9132	29.7414	5151.5	6386.52	6496.46	1016.78	953.249	853.232
ENSG00000135114.12	OASL	440.639	7.44579	0.359379	20.7185	2.36e-95	5e-93	-2.11043	0.149108	-14.1537	1.77e-45	3.71e-43	6.23027	2.98958	9.2301	1006.07	1054.1	1144.24	281.019	249.932	211.938
ENSG00000128284.19	APOL3	2026.93	7.32144	0.207372	35.3058	4.79e-273	3.79e-270	-2.28281	0.149067	-15.314	6.17e-53	1.55e-50	44.5019	29.8958	18.4602	4758.55	5168.4	5127.83	1180.28	993.589	920.833
ENSG00000136514.3	RTP4	100.4	7.27646	0.668486	10.885	1.36e-27	5.69e-26	-2.33648	0.209455	-11.1551	6.76e-29	6.79e-27	0.890038	2.98958	1.02557	257.048	258.076	235.017	48.0288	42.9708	57.552
ENSG00000197142.10	ACSL5	174.644	7.0767	0.501657	14.1066	3.46e-45	2.7e-43	-1.59286	0.158935	-10.0221	1.22e-23	9.28e-22	3.56015	2.98958	2.05113	408.749	393.423	372.199	121.605	142.067	125.153
ENSG00000185885.16	IFITM1	1567.79	7.06135	0.206557	34.186	3.9e-256	2.88e-253	-3.46802	0.152968	-22.6715	8.56e-114	5.99e-111	41.8318	29.8958	23.588	3615.53	4686.66	4550.39	428.171	361.305	372.718
ENSG00000137959.16	IFI44L	1122.75	6.8662	0.241031	28.4867	1.71e-178	8.32e-176	-2.29233	0.176143	-13.014	1.02e-38	1.56e-36	26.7011	21.9236	22.5625	3510.18	2436.24	2386.32	514.01	543.712	643.121
ENSG00000102524.11	TNFSF13B	269.196	6.86498	0.370758	18.5161	1.53e-76	2.49e-74	-3.92179	0.215546	-18.1947	5.69e-74	2.33e-71	6.23027	5.97916	7.17897	868.065	719.172	667.831	37.8099	44.7247	65.7738
ENSG00000183486.13	MX2	304.605	6.61668	0.348818	18.9689	3.09e-80	5.37e-78	-1.20683	0.141333	-8.53892	1.35e-17	7.28e-16	6.23027	4.98263	8.20453	654.209	612.5	631.674	310.654	250.809	262.181
ENSG00000157601.14	MX1	562.024	6.45595	0.261383	24.6992	1.09e-134	3.59e-132	-2.08148	0.163494	-12.7312	3.97e-37	5.76e-35	23.141	12.9548	9.2301	1284.19	1348.88	1420.74	380.143	268.348	310.598
ENSG00000134470.21	IL15RA	388.394	6.44959	0.311061	20.7342	1.7e-95	3.65e-93	-1.44884	0.171603	-8.44292	3.09e-17	1.6e-15	8.90038	12.9548	7.17897	691.081	926.78	918.799	355.617	293.78	280.452
ENSG00000149131.16	SERPING1	3149.1	6.43859	0.160966	39.9998	0	0	-3.32634	0.140771	-23.6295	1.92e-123	1.57e-120	107.695	103.639	82.0453	7552.37	8968.43	8983.81	985.101	801.536	757.312
ENSG00000119922.10	IFIT2	1597.29	6.39798	0.150097	42.6256	0	0	-3.08657	0.102367	-30.152	1.01e-199	2.12e-196	48.9521	51.8194	50.2528	4421.44	4129.22	4175.01	529.338	496.356	473.206
ENSG00000225492.6	GBP1P1	1255.66	6.35424	0.171823	36.9813	2.29e-299	2.33e-296	-3.49431	0.124908	-27.9751	3.27e-172	5.14e-169	49.8421	28.8993	46.1505	3219.42	3430.69	3614.58	315.764	285.01	310.598
ENSG00000140105.18	WARS1	37745.7	6.20496	0.0871293	71.2156	0	0	-2.70178	0.0843993	-32.0119	7.44e-225	2.81e-221	1344.85	1302.46	1297.34	92184.5	98700.9	100148	15722.8	15002.1	14008.9
ENSG00000137752.24	CASP1	179.577	6.15887	0.38407	16.0358	7.19e-58	8.1e-56	-1.16007	0.146159	-7.93707	2.07e-15	9.06e-14	4.45019	6.97568	4.10227	364.503	365.894	375.389	166.568	166.621	161.694
ENSG00000140511.12	HAPLN3	978.684	6.0783	0.181401	33.5074	3.76e-246	2.59e-243	-2.64582	0.127968	-20.6755	5.75e-95	3.1e-92	42.7218	35.8749	31.7926	2210.19	2724.14	2564.98	415.909	402.522	380.026
ENSG00000117228.10	GBP1	16135	6.03445	0.08347	72.2948	0	0	-3.20601	0.0779923	-41.1068	0	0	647.058	673.652	651.235	42689	43197.3	43351.6	4660.84	4444.41	4900.14
ENSG00000162645.13	GBP2	7564.98	5.89918	0.111579	52.8702	0	0	-2.73108	0.102988	-26.5184	5.95e-155	8.02e-152	347.115	333.836	295.363	18160.9	19876.4	20285.9	3152.53	2892.2	2740.57
ENSG00000025708.14	TYMP	251.846	5.89075	0.290401	20.2849	1.75e-91	3.53e-89	-3.18901	0.183698	-17.3601	1.65e-67	6.12e-65	9.79042	8.96874	15.3835	589.947	744.406	677.401	79.7073	79.8029	61.2061
ENSG00000119917.14	IFIT3	4192.71	5.7432	0.109415	52.4901	0	0	-1.96116	0.092609	-21.1768	1.56e-99	9.51e-97	183.348	182.364	186.653	9916.37	9623.37	10043	2751.95	2427.41	2419.93
ENSG00000137496.18	IL18BP	2248	5.62552	0.12987	43.3165	0	0	-4.3923	0.117349	-37.4293	1.31e-306	8.21e-303	131.726	119.583	132.298	5620.3	6654.92	6670.86	305.545	300.795	295.982
ENSG00000133106.14	EPSTI1	1326.03	5.51762	0.138754	39.7656	0	0	-1.93095	0.100597	-19.1949	4.08e-82	1.88e-79	72.0931	65.7707	64.6107	3096.17	3135.91	3062.66	772.548	787.505	876.983
ENSG00000068079.8	IFI35	1979.37	5.50951	0.15463	35.6303	4.77e-278	4.64e-275	-1.7476	0.13262	-13.1775	1.18e-39	1.89e-37	107.695	89.6874	98.4544	3838.87	4802.51	4856.66	1479.7	1285.62	1255.18
ENSG00000125347.14	IRF1	5312.1	5.48039	0.127923	42.8414	0	0	-2.05436	0.119153	-17.2413	1.3e-66	4.54e-64	308.843	300.951	236.906	11388.1	13135.5	13325.8	3187.27	3056.19	2869.38
ENSG00000168394.11	TAP1	291.375	5.47817	0.2403	22.7972	4.89e-115	1.33e-112	-2.56094	0.148866	-17.2029	2.52e-66	8.66e-64	15.1306	15.9444	18.4602	671.064	760.464	768.856	119.561	135.051	117.845
ENSG00000182326.15	C1S	1264.9	5.33601	0.162402	32.8569	9.09e-237	6.08e-234	-2.43049	0.13723	-17.711	3.45e-70	1.36e-67	91.6739	84.7047	55.3806	2926.56	3193.26	3287.05	626.418	591.067	528.017
ENSG00000142583.18	SLC2A5	177.599	5.33209	0.293636	18.1588	1.09e-73	1.73e-71	-3.49126	0.211967	-16.4708	5.95e-61	1.81e-58	17.8008	7.97221	9.2301	443.514	487.477	504.063	54.1601	39.463	34.7139
ENSG00000173193.15	PARP14	7015.98	5.15408	0.111889	46.0644	0	0	-1.87563	0.105763	-17.7342	2.28e-70	9.16e-68	453.029	465.378	445.096	18296.8	15322.8	14930.5	4373.68	4581.21	4275.29
ENSG00000244731.8	C4A	134.029	5.04809	0.364192	13.8611	1.09e-43	8.1e-42	-4.76123	0.346873	-13.7262	7.08e-43	1.32e-40	7.1203	7.97221	19.4858	311.829	433.568	383.896	24.5253	9.6465	8.22172
ENSG00000115267.8	IFIH1	503.245	5.02059	0.193936	25.8879	9.13e-148	3.69e-145	-1.33298	0.136175	-9.78875	1.26e-22	9.15e-21	30.2613	36.8715	30.767	1208.34	940.544	1023.01	416.931	411.292	431.184
ENSG00000159403.18	C1R	584.363	4.92674	0.193413	25.4727	3.96e-143	1.49e-140	-3.01468	0.165482	-18.2176	3.74e-74	1.57e-71	54.2923	57.7985	36.9204	1336.86	1632.19	1578.12	210.509	198.192	154.386
ENSG00000129682.16	FGF13	155.472	4.82047	0.317985	15.1594	6.57e-52	6.63e-50	-4.3031	0.294514	-14.6109	2.39e-48	5.44e-46	12.4605	15.9444	17.4346	552.022	369.335	366.881	17.3721	14.9082	32.8869
ENSG00000172183.15	ISG20	138.654	4.81949	0.284836	16.9202	3.19e-64	4.04e-62	-2.85113	0.202109	-14.1069	3.44e-45	7.06e-43	15.1306	9.96526	12.3068	312.882	360.159	390.277	44.9631	46.4786	55.725
ENSG00000187608.10	ISG15	1400.66	4.7407	0.174892	27.1065	8.26e-162	3.68e-159	-1.83095	0.160217	-11.428	3.03e-30	3.36e-28	133.506	106.628	116.915	2535.72	3650.92	3374.25	1015.76	841.876	830.394
ENSG00000162981.14	LRATD1	216.156	4.53306	0.230944	19.6284	8.84e-86	1.67e-83	-2.24002	0.170837	-13.1121	2.81e-39	4.38e-37	16.0207	23.9166	27.6903	558.343	493.212	498.746	91.97	114.004	121.499
ENSG00000126709.15	IFI6	2939.9	4.53104	0.12787	35.4348	4.98e-275	4.26e-272	-0.967726	0.117615	-8.2279	1.91e-16	9.17e-15	266.121	271.055	197.934	5315.84	5907.07	5797.79	3036.03	2832.56	2834.67
ENSG00000204642.14	HLA-F	161.965	4.51875	0.26519	17.0397	4.17e-65	5.41e-63	-1.75075	0.184051	-9.5123	1.86e-21	1.26e-19	15.1306	13.9514	18.4602	306.562	400.305	380.706	95.0357	107.865	119.672
ENSG00000128335.14	APOL2	5944.03	4.40394	0.117684	37.4218	1.73e-306	1.85e-303	-1.83542	0.113848	-16.1216	1.8e-58	5.12e-56	712.92	571.01	618.417	12123.4	14049.7	14127.6	3971.06	3695.49	3626.69
ENSG00000156587.16	UBE2L6	3887.91	4.40079	0.124352	35.3898	2.45e-274	2.02e-271	-1.40393	0.118054	-11.8923	1.3e-32	1.57e-30	438.789	386.652	335.36	7320.61	8548.62	8682.86	3175.01	3088.63	3014.63
ENSG00000164171.11	ITGA2	225.077	4.39342	0.234593	18.7278	2.94e-78	4.99e-76	-2.03132	0.181937	-11.165	6.05e-29	6.1e-27	21.3609	28.8993	24.6136	628.925	458.802	479.605	122.627	119.266	141.596
ENSG00000002549.12	LAP3	6254.2	4.34114	0.0977278	44.4208	0	0	-2.24313	0.0940268	-23.8563	8.71e-126	7.83e-123	734.281	733.443	735.331	14061.8	15279.2	15311.2	3208.73	2871.15	3352.63
ENSG00000185745.10	IFIT1	884.41	4.32124	0.144978	29.8062	3.25e-195	1.78e-192	-1.607	0.122744	-13.0924	3.64e-39	5.63e-37	100.574	94.67	93.3266	2060.6	1807.68	1905.66	714.3	572.651	610.234
ENSG00000221963.6	APOL6	3821.17	4.3016	0.131455	32.7228	7.39e-235	4.8e-232	-1.4278	0.1259	-11.3407	8.25e-30	8.84e-28	376.486	460.395	389.715	9257.95	7483.06	7436.53	2811.22	3051.8	3123.34
ENSG00000101347.10	SAMHD1	2708.75	4.26527	0.101006	42.2278	0	0	-2.03055	0.0925311	-21.9445	9.77e-107	6.59e-104	312.403	351.774	313.823	6607.4	6131.89	6059.39	1585.97	1475.91	1540.2
ENSG00000138496.16	PARP9	1566.12	4.23175	0.112733	37.5377	0	0	-2.38501	0.101299	-23.5442	1.44e-122	1.13e-119	209.159	199.305	193.832	4074.85	3531.63	3717.73	738.826	698.933	730.82
ENSG00000162772.17	ATF3	252.612	4.22533	0.207274	20.3853	2.26e-92	4.61e-90	-2.80531	0.174017	-16.1209	1.82e-58	5.12e-56	34.7115	28.8993	37.946	582.572	648.058	668.894	107.298	92.9572	72.1684
ENSG00000157873.17	TNFRSF14	605.152	4.14662	0.169404	24.4777	2.55e-132	8.16e-130	-1.70587	0.146116	-11.6748	1.72e-31	2.05e-29	83.6636	78.7256	62.5596	1131.43	1458.99	1405.85	433.281	420.061	371.804
ENSG00000261971.8	NA	371.233	4.10455	0.187861	21.8489	7.97e-106	1.96e-103	-2.27132	0.160364	-14.1635	1.54e-45	3.27e-43	56.0724	49.8263	47.1761	790.107	913.016	936.877	220.728	169.252	158.04
ENSG00000177409.12	SAMD9L	4578.36	4.04806	0.171601	23.59	4.88e-123	1.45e-120	-1.3202	0.168626	-7.82914	4.91e-15	2.08e-13	496.641	636.78	572.266	12003.3	8201.08	8000.14	3455.01	4048.9	3791.13
ENSG00000132530.17	XAF1	872.472	4.0163	0.148508	27.0444	4.45e-161	1.9e-158	-1.29424	0.129769	-9.97344	1.99e-23	1.51e-21	109.475	88.6908	132.298	1778.27	1804.24	1759.97	803.205	714.718	661.392
ENSG00000138642.15	HERC6	596.794	3.99574	0.161265	24.7774	1.57e-135	5.25e-133	-0.983961	0.133199	-7.38714	1.5e-13	5.54e-12	85.4436	69.7568	58.4573	1265.23	1127.51	1032.59	588.608	551.604	591.964
ENSG00000164342.13	TLR3	383.824	3.97974	0.230301	17.2806	6.58e-67	8.81e-65	-0.893402	0.199915	-4.4689	7.86e-06	0.000101414	39.1617	55.8055	42.0482	924.952	587.266	644.435	327.004	401.645	432.097
ENSG00000204267.16	TAP2	176.82	3.864	0.226159	17.0853	1.91e-65	2.49e-63	-1.31103	0.168803	-7.76666	8.06e-15	3.34e-13	29.3713	20.927	23.588	412.963	345.248	323.281	148.174	151.713	136.115
ENSG00000112139.16	MDGA1	789.15	3.81014	0.149657	25.4591	5.59e-143	2.06e-140	-2.43199	0.138749	-17.528	8.76e-69	3.37e-66	149.526	128.552	124.094	1669.76	2030.2	1952.45	377.077	368.321	302.377
ENSG00000197536.11	NA	248.164	3.79029	0.188594	20.0977	7.73e-90	1.53e-87	-1.59522	0.147475	-10.8169	2.86e-27	2.65e-25	39.1617	37.868	37.946	487.76	544.827	559.361	174.743	194.684	157.126
ENSG00000175899.15	A2M	392.694	3.76331	0.176925	21.2707	2.12e-100	4.78e-98	-1.31392	0.147955	-8.88051	6.66e-19	3.92e-17	51.6222	73.7429	51.2783	702.669	862.547	829.471	323.939	340.258	298.722
ENSG00000184979.10	USP18	174.7	3.76283	0.257084	14.6366	1.64e-48	1.46e-46	-1.46008	0.214421	-6.8094	9.8e-12	2.98e-10	36.4916	27.9027	15.3835	324.471	391.129	378.579	162.48	127.158	108.709
ENSG00000205220.12	PSMB10	605.377	3.71751	0.151991	24.4587	4.07e-132	1.28e-129	-1.24917	0.130717	-9.5563	1.22e-21	8.44e-20	104.134	85.7013	86.1476	1053.48	1301.85	1285.68	512.988	529.68	488.736
ENSG00000184371.14	CSF1	9159.22	3.69421	0.122284	30.2101	1.74e-200	1.01e-197	-2.10531	0.121125	-17.3813	1.14e-67	4.32e-65	1807.67	1564.55	1489.12	18570.7	21989.2	22383	5286.23	4798.69	4543.87
ENSG00000115415.20	STAT1	19684.4	3.686	0.11634	31.6831	2.66e-220	1.63e-217	-0.579548	0.115357	-5.02394	5.06e-07	8.09e-06	2419.12	2767.35	2694.16	38378.1	31309.8	31727.3	21058.1	22854.3	23951.7
ENSG00000116663.11	FBXO6	136.138	3.6689	0.248885	14.7414	3.5e-49	3.17e-47	-1.515	0.196335	-7.7164	1.2e-14	4.86e-13	28.4812	18.934	19.4858	238.086	321.161	298.822	107.298	104.358	88.6119
ENSG00000135899.18	SP110	1529.5	3.58401	0.101026	35.4761	1.15e-275	1.02e-272	-1.22192	0.0897127	-13.6203	3.03e-42	5.45e-40	253.661	256.107	249.213	2942.36	3082	3078.61	1375.46	1283.86	1244.22
ENSG00000058866.15	DGKG	157.619	3.54599	0.227794	15.5667	1.23e-54	1.27e-52	-1.11619	0.175596	-6.35661	2.06e-10	5.36e-09	21.3609	29.8958	27.6903	310.776	294.78	311.583	118.539	137.682	166.261
ENSG00000110446.11	SLC15A3	953.529	3.5238	0.126574	27.8398	1.43e-170	6.65e-168	-0.889461	0.110938	-8.01768	1.08e-15	4.83e-14	151.306	150.475	156.912	1581.27	1844.38	1849.3	1011.67	913.787	922.66
ENSG00000111331.13	OAS3	2841.77	3.52001	0.128001	27.4998	1.77e-166	8.04e-164	-1.37589	0.123864	-11.1081	1.15e-28	1.13e-26	577.635	466.374	468.684	5292.67	6096.33	5980.7	2436.18	2227.46	2029.85
ENSG00000144857.14	BOC	593.191	3.50219	0.166568	21.0256	3.83e-98	8.45e-96	-1.49254	0.151812	-9.83153	8.24e-23	6.05e-21	127.275	93.6735	104.608	1062.96	1351.17	1284.62	459.85	471.801	382.767
ENSG00000151136.15	BTBD11	114.099	3.48642	0.259618	13.4291	4.09e-41	2.83e-39	-2.22783	0.224322	-9.93143	3.04e-23	2.28e-21	26.7011	28.8993	14.3579	290.759	262.664	235.017	56.2039	45.6016	66.6873
ENSG00000164509.15	IL31RA	132.927	3.48454	0.25835	13.4877	1.85e-41	1.29e-39	-0.237112	0.184159	-1.28754	0.197907	0.432613	17.8008	21.9236	15.3835	210.695	223.666	182.909	196.203	179.776	147.991
ENSG00000130589.16	HELZ2	1377.87	3.4841	0.187339	18.5979	3.34e-77	5.59e-75	-0.988054	0.180802	-5.46484	4.63e-08	8.8e-07	277.692	193.326	223.574	2211.25	3015.47	2555.41	1588.02	1242.64	1093.49
ENSG00000137628.17	DDX60	1450.95	3.45005	0.17664	19.5316	5.92e-85	1.1e-82	-1.25204	0.170838	-7.32883	2.32e-13	8.41e-12	226.96	268.066	296.389	3586.03	2460.32	2593.69	1043.35	1263.69	1320.04
ENSG00000059378.13	PARP12	914.799	3.43022	0.133509	25.6927	1.41e-145	5.39e-143	-0.629279	0.117763	-5.34362	9.11e-08	1.65e-06	160.207	128.552	149.733	1486.46	1565.66	1681.27	1118.97	981.312	961.028
ENSG00000008517.18	IL32	5175.57	3.39236	0.134418	25.2374	1.56e-140	5.65e-138	-2.27715	0.133191	-17.0969	1.56e-65	5.18e-63	1285.21	1092.19	1029.67	10136.6	12689.3	12963.1	2646.69	2415.13	2322.18
ENSG00000111801.16	BTN3A3	1212.17	3.38533	0.134304	25.2064	3.41e-140	1.22e-137	-1.43373	0.126142	-11.366	6.18e-30	6.66e-28	266.121	253.118	191.781	2474.62	2463.77	2504.36	990.21	926.064	839.529
ENSG00000225131.2	PSME2P2	776.372	3.38305	0.130263	25.971	1.05e-148	4.34e-146	-1.22166	0.115621	-10.5661	4.28e-26	3.76e-24	154.867	151.472	132.298	1376.89	1635.63	1570.68	685.687	635.792	644.035
ENSG00000163840.10	DTX3L	2472	3.37351	0.100246	33.6523	2.89e-248	2.06e-245	-1.27547	0.0946058	-13.482	2e-41	3.56e-39	470.83	467.371	484.068	5367.46	4678.63	4691.83	1976.33	2088.03	2023.46
ENSG00000185215.11	TNFAIP2	6267.89	3.35161	0.12481	26.8537	7.63e-159	3.2e-156	-2.04194	0.123606	-16.5198	2.64e-61	8.17e-59	1504.16	1257.62	1358.88	12373.1	14775.7	14924.1	3682.89	3480.63	3053.91
ENSG00000182179.13	UBA7	1782.35	3.31629	0.152032	21.8131	1.74e-105	4.24e-103	-0.543163	0.145569	-3.73132	0.000190482	0.00173904	360.465	280.024	259.468	2695.85	3111.82	3171.13	2274.72	2088.91	1798.73
ENSG00000145681.11	HAPLN1	106.341	3.31	0.353871	9.35371	8.46e-21	2.54e-19	-4.47487	0.391294	-11.4361	2.76e-30	3.08e-28	17.8008	28.8993	37.946	303.401	256.929	274.364	12.2627	2.63086	22.8381
ENSG00000137767.14	SQOR	504.795	3.30946	0.140545	23.5474	1.34e-122	3.92e-120	-1.10786	0.119637	-9.26019	2.04e-20	1.31e-18	101.464	96.663	94.3521	889.134	1034.6	979.414	483.353	438.477	425.702
ENSG00000026950.17	BTN3A1	1089.42	3.30115	0.115841	28.4972	1.27e-178	6.31e-176	-1.06819	0.104288	-10.2427	1.28e-24	1.04e-22	211.829	222.225	195.883	1977.38	2101.31	2133.23	1035.17	1024.28	903.476
ENSG00000146859.6	TMEM140	813.075	3.29508	0.136043	24.2208	1.34e-129	4.11e-127	-1.68204	0.126057	-13.3435	1.29e-40	2.18e-38	186.018	156.455	184.602	1550.72	1780.15	1846.11	568.17	560.374	485.081
ENSG00000108771.13	DHX58	296.74	3.24954	0.219903	14.7772	2.06e-49	1.88e-47	-0.615516	0.194157	-3.17019	0.00152338	0.0106316	74.7632	46.8367	36.9204	463.53	526.475	529.585	389.34	299.918	303.29
ENSG00000204264.12	PSMB8	150.074	3.24172	0.218909	14.8085	1.29e-49	1.19e-47	-0.697594	0.166276	-4.19539	2.72e-05	0.00030986	33.8214	23.9166	24.6136	249.674	259.223	275.427	166.568	142.944	174.483
ENSG00000168404.13	MLKL	916.925	3.24019	0.113201	28.6233	3.45e-180	1.76e-177	-1.3011	0.101009	-12.881	5.76e-38	8.62e-36	202.039	183.361	191.781	1736.13	1878.79	1843.98	784.811	702.441	728.992
ENSG00000140853.15	NLRC5	2000.56	3.23736	0.139307	23.2391	1.83e-119	5.24e-117	-1.65048	0.135588	-12.1728	4.34e-34	5.57e-32	475.28	429.503	434.84	3728.25	4467.58	4442.99	1504.22	1398.74	1123.63
ENSG00000239713.9	APOBEC3G	381.618	3.14518	0.18046	17.4287	5e-68	6.9e-66	-1.25486	0.163341	-7.68246	1.56e-14	6.31e-13	108.585	69.7568	73.8408	678.439	812.079	751.841	346.42	311.319	282.279
ENSG00000130707.18	ASS1	3146.18	3.13167	0.160439	19.5194	7.52e-85	1.39e-82	-2.12145	0.159071	-13.3365	1.42e-40	2.35e-38	936.32	813.165	653.286	6021.67	7296.1	7752.37	1782.17	1658.32	1402.26
ENSG00000227462.1	PSME2P6	131.955	3.13138	0.217819	14.3761	7.31e-47	6.11e-45	-1.11122	0.171992	-6.46089	1.04e-10	2.8e-09	32.0414	26.9062	26.6647	221.23	267.252	264.793	118.539	110.496	119.672
ENSG00000248988.1	PSME2P3	238.91	3.11547	0.205777	15.14	8.82e-52	8.82e-50	-1.25449	0.182173	-6.88626	5.73e-12	1.79e-10	64.0827	54.8089	42.0482	391.893	515.005	494.492	215.619	164.867	207.37
ENSG00000011465.18	DCN	110.631	3.11141	0.247115	12.5909	2.37e-36	1.4e-34	-3.65042	0.26359	-13.8488	1.29e-43	2.49e-41	35.6015	35.8749	24.6136	284.439	261.517	287.125	26.5691	28.0625	11.8758
ENSG00000238000.1	PSME2P1	1110.2	3.10464	0.124541	24.9287	3.64e-137	1.28e-134	-1.29677	0.116594	-11.1221	9.79e-29	9.72e-27	267.901	259.097	234.855	1957.36	2282.54	2319.33	964.663	841.876	864.194
ENSG00000185499.16	MUC1	263.433	3.08616	0.191899	16.0822	3.4e-58	3.85e-56	-2.63454	0.18469	-14.2647	3.63e-46	7.79e-44	89.0038	60.7881	67.6874	563.61	634.293	656.133	114.452	78.0489	106.882
ENSG00000117226.12	GBP3	8287.65	3.0331	0.0862575	35.1634	7.26e-271	5.55e-268	-0.92806	0.0845999	-10.97	5.33e-28	5.08e-26	1739.13	1916.32	1875.76	15411.3	14870.9	14984.7	7760.22	7603.2	8427.26
ENSG00000186088.16	GSAP	583.968	3.01229	0.167643	17.9685	3.44e-72	5.12e-70	-1.54415	0.158579	-9.73745	2.09e-22	1.5e-20	134.396	158.448	151.784	1421.14	1080.48	1081.5	368.902	473.555	385.507
